# Supplementary material for: The prevalence of vitamin A deficiency and its public health significance in children in low- and middle-income countries: A systematic review and modelling analysis
Source: PubMed Central journal article supplement (PMC10416138; doi:10.7189/jogh.13.04084), 2023-08-11
Supplement: jogh-13-04084-s001.pdf [file jogh-13-04084-s001.pdf]

## **ONLINE SUPPLEMENTARY DOCUMENT**

**Title:** The Prevalence of Vitamin A Deficiency and Its Public Health Significance in Children in Low- and Middle-Income Countries: A Systematic Review and Modelling Analysis

**Authors:** Peige Song\*, Davies Adeloje\*, Shuting Li, Dong Zhao, Xinxin Ye, Qing Pan, Yiwen Qiu, Ronghua Zhang, Igor Rudan; Global Health Epidemiology Research Group (GHERG)

**Table S1.** Search strategy to identify studies reporting the prevalence of VAD or mVAD

**Table S2.** The time lag between investigation and publication in the included articles (n=116)

**Table S3.** Quality assessment scale

for rating the risk of bias

**Table S4.** Age-adjusted meta-regression models of cluster-level factors related to the prevalence of VAD and mVAD (logit form)

**Table S5.** Detailed characteristics of the included articles (n=116)

**Table S6.** Quality scores for assessing the risk of bias in the included articles (n=116)

**Table S7.** National prevalence of VAD and public health significance in 2019, by age group

**Figure S1.** Contributing data sources across world regions

**Figure S2.** The relations of age and prevalence of VAD and mVAD, by SDI

**eMethods.** Detailed process of the estimation of the prevalence of VAD or mVAD

## **References**

This supplementary material has been provided by the authors to give readers additional information about their work.

**Table S1. Search strategy to identify studies reporting the prevalence of VAD or mVAD**

| Database        | Access date               | Search terms                                                                                                                                                                                                                                                                                                                                                                                                                                                                                                                                                                                                                                                                                                                                                                   |
|-----------------|---------------------------|--------------------------------------------------------------------------------------------------------------------------------------------------------------------------------------------------------------------------------------------------------------------------------------------------------------------------------------------------------------------------------------------------------------------------------------------------------------------------------------------------------------------------------------------------------------------------------------------------------------------------------------------------------------------------------------------------------------------------------------------------------------------------------|
| PubMed          | 5 <sup>th</sup> Oct, 2022 | ('vitamin a'[Title/Abstract] OR retinol[Title/Abstract] OR retinal[Title/Abstract] OR 'aquasol a' [Title/Abstract] OR 'night blindness'[Title/Abstract] OR 'Bitot's spots'[Title/Abstract] OR xerophthalmia[Title/Abstract]) AND (infan* OR child* OR teen* OR adolescen* OR pediatric* OR paediatric*) AND (prevalence[Title/Abstract] OR epidemiolog*[Title/Abstract]) AND ("2000/01/01"[Date - Publication] : "3000"[Date - Publication])                                                                                                                                                                                                                                                                                                                                   |
| MEDLINE (1950-) | 5 <sup>th</sup> Oct, 2022 | <ol style="list-style-type: none"> <li>1 exp Vitamin A Deficiency/</li> <li>2 ('vitamin a' or retinol or retinal or 'aquasol a' or 'night blindness' or 'Bitot spots' or xerophthalmia).ab,ti.</li> <li>3 (infan* or child* or teen* or adolescen* or pediatric* or paediatric*).ab,ti.</li> <li>4 (prevalen* or epidemiolog*).ab,ti.</li> <li>5 1 or 2</li> <li>6 3 or 4</li> <li>7 5 and 6</li> <li>8 limit 7 to (humans and yr="2000 -Current" and medline)</li> </ol>                                                                                                                                                                                                                                                                                                      |
| EMBASE (1980-)  | 5 <sup>th</sup> Oct, 2022 | <ol style="list-style-type: none"> <li>1 ('vitamin a deficiency':ab,ti OR 'vitamin a':ab,ti OR retinol:ab,ti OR retinal:ab,ti OR 'aquasol a':ab,ti OR 'night blindness':ab,ti OR 'Bitot's spots':ab,ti OR xerophthalmia:ab,ti)</li> <li>2 (infan*:ab,ti OR child*:ab,ti OR teen*:ab,ti OR adolescen*:ab,ti OR pediatric*:ab,ti OR paediatric*:ab,ti)</li> <li>3 (prevalen*:ab,ti or epidemiolog*:ab,ti)</li> <li>4 #1 AND #2 AND #3</li> <li>6 #4 AND (2000:py OR 2001:py OR 2002:py OR 2003:py OR 2004:py OR 2005:py OR 2006:py OR 2007:py OR 2008:py OR 2009:py OR 200:py OR 2011:py OR 2012:py OR 2013:py OR 204:py OR 2015:py OR 2016:py OR 2017:py OR 2018:py OR 2019:py OR 2020:py OR 2021:py OR 2022:py OR) AND [embase]/lim AND 'human'/de AND 'article'/it</li> </ol> |

**Table S2. The time lag between investigation and publication in the included articles (n=116)**

| Study ID | Author(s)                       | Year of publication | Year of investigation | Time-lag (year) |
|----------|---------------------------------|---------------------|-----------------------|-----------------|
| V1       | Disalvo L, et al.[1]            | 2019                | 2011                  | 8               |
| V2       | Onoja US, et al.[2]             | 2019                | 2017                  | 2               |
| V3       | Hanson C, et al.[3]             | 2018                | 2018                  | 0               |
| V4       | Ayogu R, et al.[4]              | 2018                | 2018                  | 0               |
| V5       | Pouraram H et al.[5]            | 2018                | 2013                  | 5               |
| V6       | Abolurin OO, et al.[6]          | 2018                | 2016                  | 2               |
| V7       | Lima DB, et al.[7]              | 2018                | 2006                  | 12              |
| V8       | Chyne D, et al.[8]              | 2017                | 2014                  | 3               |
| V9       | Longvah T, et al.[9]            | 2017                | 2013                  | 4               |
| V10      | Alaofè H, et al.[10]            | 2017                | 2014                  | 3               |
| V11      | Rahman S, et al.[11]            | 2017                | 2012                  | 5               |
| V12      | Alouache A, et al.[12]          | 2017                | 2009                  | 8               |
| V13      | Ayogu RN, et al.[13]            | 2016                | NA                    | NA              |
| V14      | Wei X ,et al.[14]               | 2016                | NA                    | NA              |
| V15      | Villalpando, et al.[15]         | 2015                | 2012                  | 3               |
| V16      | Talsma EF, et al.[16]           | 2015                | 2010                  | 5               |
| V17      | Marasinghe E, et al.[17]        | 2015                | NA                    | NA              |
| V18      | Sandjaja, et al.[18]            | 2015                | 2011                  | 4               |
| V19      | Faber M, et al.[19]             | 2015                | 2011                  | 4               |
| V20      | Konstantyner T, et al.[20]      | 2014                | 2006                  | 8               |
| V21      | Herrador Z, et al.[21]          | 2014                | 2009                  | 5               |
| V22      | Ribeiro-Silva RC, et al.[22]    | 2014                | 2009                  | 5               |
| V23      | Martínez-Torres J, et al.[23]   | 2014                | 2010                  | 4               |
| V24      | Dong C, et al.[24]              | 2014                | 2009                  | 5               |
| V25      | Rohner F, et al.[25]            | 2014                | 2007                  | 7               |
| V26      | Rojroongwasinkul N, et al.[26]  | 2013                | 2011                  | 2               |
| V27      | Poh BK, et al.[27]              | 2013                | 2011                  | 2               |
| V28      | Queiroz D, et al.[28]           | 2013                | 2007                  | 6               |
| V29      | Lailou A, et al.[29]            | 2012                | 2010                  | 2               |
| V30      | Hotz C, et al.[30]              | 2012                | 2009                  | 3               |
| V31      | Laxmaiah A, et al.[31]          | 2012                | 2004                  | 8               |
| V32      | Van Stuijvenberg ME, et al.[32] | 2012                | 2008                  | 4               |
| V33      | Engle-Stone R, et al.[33]       | 2011                | NA                    | NA              |
| V34      | Temple VJ, et al.[34]           | 2011                | 2008                  | 3               |
| V35      | Arlappa N, et al.[35]           | 2011                | 2003                  | 8               |
| V36      | Arlappa N, et al.[36]           | 2011                | 2003                  | 8               |
| V37      | Fares S, et al.[37]             | 2011                | NA                    | NA              |
| V38      | Durán P, et al.[38]             | 2011                | 2005                  | 6               |
| V39      | Dillon D, et al.[39]            | 2010                | 2001                  | 9               |
| V40      | Custodio VI, et al.[40]         | 2009                | 2004                  | 5               |
| V41      | Khatib IMD, et al.[41]          | 2009                | 2004                  | 5               |

| Study ID | Author(s)                                  | Year of publication | Year of investigation | Time-lag (year) |
|----------|--------------------------------------------|---------------------|-----------------------|-----------------|
| V42      | Tatala SR, et al.[42]                      | 2008                | 1996                  | 12              |
| V43      | Jiang JX, et al.[43]                       | 2008                | 2000                  | 8               |
| V44      | Calis JCJ, et al.[44]                      | 2008                | 2003                  | 5               |
| V45      | Al-Mekhlafi MH, et al.[45]                 | 2007                | 2004                  | 3               |
| V46      | Yang R, et al.[46]                         | 2007                | 2006                  | 1               |
| V47      | Khan NC, et al.[47]                        | 2007                | NA                    | NA              |
| V48      | Jiang J, et al.[48]                        | 2006                | 2000                  | 6               |
| V49      | Hix J, et al.[49]                          | 2006                | 2001                  | 5               |
| V50      | Maziya-Dixon B.B, et al.[50]               | 2006                | 2001                  | 5               |
| V51      | Thurlow R.A, et al.[51]                    | 2005                | 2002                  | 3               |
| V52      | Santos M.A, et al.[52]                     | 2005                | NA                    | NA              |
| V53      | Nasri I, et al.[53]                        | 2004                | NA                    | NA              |
| V54      | Coles C.L, et al.[54]                      | 2004                | 1996                  | 8               |
| V55      | Gamble M.V, et al.[55]                     | 2004                | 1994                  | 10              |
| V56      | Yamamura C.M, et al.[56]                   | 2004                | 1993                  | 11              |
| V57      | Villalpando S, et al.[57]                  | 2003                | 1999                  | 4               |
| V58      | Adelekan D.A, et al.[58]                   | 2003                | 1997                  | 6               |
| V59      | Oso O.O, et al.[59]                        | 2003                | 1993                  | 10              |
| V60      | Palafox N.A, et al.[60]                    | 2003                | 1995                  | 8               |
| V61      | Tan Z, et al.[61]                          | 2002                | 2000                  | 2               |
| V62      | Schémann J.F, et al.[62]                   | 2002                | 1997                  | 5               |
| V63      | Swami H.M, et al.[63]                      | 2001                | 2000                  | 1               |
| V64      | Centers for Disease Control Prevention[64] | 2001                | 2000                  | 1               |
| V65      | Kassaye T, et al.[65]                      | 2001                | 1997                  | 4               |
| V66      | Centers for Disease Control Prevention[66] | 1999                | 1999                  | 0               |
| V67      | Ferraz I.S, et al.[67]                     | 2000                | 1997                  | 3               |
| V68      | Li X.C, et al.[68]                         | 2020                | 2009                  | 11              |
| V69      | Zhang Z, et al.[69]                        | 2018                | 2016                  | 2               |
| V70      | Gubert M.B, et al.[70]                     | 2016                | 2006                  | 10              |
| V71      | Jin C, et al.[71]                          | 2016                | 2015                  | 1               |
| V72      | Pajuelo J, et al.[72]                      | 2015                | 2009                  | 6               |
| V73      | De Moura F.F, et al.[73]                   | 2015                | 2011                  | 4               |
| V74      | Kurihayashi A.Y, et al.[74]                | 2015                | 2013                  | 2               |
| V75      | Augusto R.A, et al.[75]                    | 2015                | 2007                  | 8               |
| V76      | Peng R, et al.[76]                         | 2014                | 2012                  | 2               |
| V77      | de Paula W.K, et al.[77]                   | 2014                | 2006                  | 8               |
| V78      | Rohner F, et al.[78]                       | 2013                | 2008                  | 5               |
| V79      | Miglioli T.C, et al.[79]                   | 2013                | 2006                  | 7               |
| V80      | Fan P, et al.[80]                          | 2012                | 2009                  | 3               |
| V81      | Garcia M.T, et al.[81]                     | 2011                | 2007                  | 4               |
| V82      | Midyat L, et al.[82]                       | 2011                | 2006                  | 5               |

| Study ID | Author(s)                        | Year of publication | Year of investigation | Time-lag (year) |
|----------|----------------------------------|---------------------|-----------------------|-----------------|
| V83      | Azevedo M.M, et al.[83]          | 2010                | 2007                  | 3               |
| V84      | Demissie T, et al.[84]           | 2010                | 2006                  | 4               |
| V85      | Khatib I.M., et al.[85]          | 2009                | NA                    | NA              |
| V86      | Durán P, et al.[86]              | 2009                | 2005                  | 4               |
| V87      | Maslova E, et al.[87]            | 2009                | 2006                  | 3               |
| V88      | Leal J. Y, et al.[88]            | 2007                | 2007                  | 0               |
| V89      | Graebner I.T, et al.[89]         | 2007                | 2003                  | 4               |
| V90      | Poveda E, et al.[90]             | 2007                | 2007                  | 0               |
| V91      | de Souza V.D.S.L, et al.[91]     | 2007                | 2002                  | 5               |
| V92      | Zhang Y, et al.[92]              | 2007                | 2002                  | 5               |
| V93      | Faruque A.S, et al.[93]          | 2006                | 1998                  | 8               |
| V94      | Paiva A.A, et al.[94]            | 2006                | NA                    | NA              |
| V95      | Li J.H, et al.[95]               | 2006                | 2002                  | 4               |
| V96      | Ahmed F, et al.[96]              | 2006                | 2000                  | 6               |
| V97      | Ferraz I.S, et al.[97]           | 2005                | 2000                  | 5               |
| V98      | Monge-Rojas R, et al.[98]        | 2005                | NA                    | NA              |
| V99      | Sibeko L.N, et al.[99]           | 2004                | 2000                  | 4               |
| V100     | Martins M.C, et al.[100]         | 2004                | 1998                  | 6               |
| V101     | Castejon H.V, et al.[101]        | 2004                | 2004                  | 0               |
| V102     | Mi J, et al.[102]                | 2003                | 2001                  | 2               |
| V103     | Lin L, et al.[103]               | 2002                | 2000                  | 2               |
| V104     | Amaya-Castellanos D, et al.[104] | 2002                | NA                    | NA              |
| V105     | Oelofse A, et al.[105]           | 2002                | 1998                  | 4               |
| V106     | Jinabhai C.C, et al.[106]        | 2001                | NA                    | NA              |
| V107     | Dijkhuizen M.A, et al.[107]      | 2001                | 1996                  | 5               |
| V108     | Albalak R, et al.[108]           | 2000                | 1996                  | 4               |
| V109     | Gowele VF, et al.[109]           | 2021                | 2016                  | 5               |
| V110     | Reddy GB, et al.[110]            | 2022                | 2017                  | 5               |
| V111     | De Castro IRR, et al.[111]       | 2021                | 2014                  | 7               |
| V112     | Reddy GB, et al.[112]            | 2021                | 2017                  | 4               |
| V113     | Tian T, et al.[113]              | 2022                | 2017                  | 5               |
| V114     | Janmohamed A, et al.[114]        | 2020                | 2017                  | 3               |
| V115     | Shan X, et al.[115]              | 2021                | 2016                  | 5               |
| V116     | Ernawati F, et al.[116]          | 2021                | 2011                  | 10              |

*Note: The average time-lag between investigation and publication was 4.84 based on 103 articles with available data.*

**Table S3. Quality assessment scale for rating the risk of bias**

| Bias type                                                 | Low risk (score=2)                                                                                                                                                                                                          | Moderate risk (score=1)                                                                                                                                                                                                                                                                                                                                                 | High risk (score=0)                                                                                                                                                                                       |
|-----------------------------------------------------------|-----------------------------------------------------------------------------------------------------------------------------------------------------------------------------------------------------------------------------|-------------------------------------------------------------------------------------------------------------------------------------------------------------------------------------------------------------------------------------------------------------------------------------------------------------------------------------------------------------------------|-----------------------------------------------------------------------------------------------------------------------------------------------------------------------------------------------------------|
| Selection (sample population)                             | <ol style="list-style-type: none"> <li>1) Sample from the general population, not a select group;</li> <li>2) Consecutive unselected population;</li> <li>3) Rationale for case and control selection explained.</li> </ol> | <ol style="list-style-type: none"> <li>1) Sample selected from large population but selection criteria not defined;</li> <li>2) Sample selection ambiguous but may be representative;</li> <li>3) Rationale for cases and controls not explained;</li> <li>4) Eligibility criteria not explained;</li> <li>5) Analysis to adjust for sampling strategy bias.</li> </ol> | <ol style="list-style-type: none"> <li>1) Highly select population making it difficult to generalise finding;</li> <li>2) Sample selection ambiguous and sample unlikely to be representative.</li> </ol> |
| Selection (sample size)                                   | <ol style="list-style-type: none"> <li>1) Sample size calculation performed and adequate.</li> </ol>                                                                                                                        | <ol style="list-style-type: none"> <li>1) Sample size calculation performed and reasons for not meeting sample size given;</li> <li>2) Sample size calculation not performed but all eligible persons studied.</li> </ol>                                                                                                                                               | <ol style="list-style-type: none"> <li>1) Sample size estimation unclear or only sub-sample studied.</li> </ol>                                                                                           |
| Selection (participation rate)                            | <ol style="list-style-type: none"> <li>1) High response rate (&gt;85%).</li> </ol>                                                                                                                                          | <ol style="list-style-type: none"> <li>1) Moderate response rate (70-85%).</li> </ol>                                                                                                                                                                                                                                                                                   | <ol style="list-style-type: none"> <li>1) Low response rate (&lt;70%);</li> <li>2) Response rate not reported.</li> </ol>                                                                                 |
| Performance bias (outcome assessment)                     | <ol style="list-style-type: none"> <li>1) Diagnosis using consistent criteria and direct examination.</li> </ol>                                                                                                            | <ol style="list-style-type: none"> <li>1) Assessment from administrative database or register;</li> <li>2) Assessment from hospital record or interviewer.</li> </ol>                                                                                                                                                                                                   | <ol style="list-style-type: none"> <li>1) Assessment from non-validated data or generic estimate from the overall population.</li> </ol>                                                                  |
| Performance bias (analytical methods to control for bias) | <ol style="list-style-type: none"> <li>1) Analysis appropriate for the type of sample (subgroup analysis/regression etc.).</li> </ol>                                                                                       | <ol style="list-style-type: none"> <li>1) Analysis does not account for common adjustment.</li> </ol>                                                                                                                                                                                                                                                                   | <ol style="list-style-type: none"> <li>1) Data confusing.</li> </ol>                                                                                                                                      |

**Table S4. Age-adjusted meta-regression models of cluster-level factors related to the prevalence of VAD and mVAD (logit form)**

| Moderator              | Number of articles | Number of data points | $\beta$   | 95 % CI |         | P value |
|------------------------|--------------------|-----------------------|-----------|---------|---------|---------|
| <b>VAD</b>             |                    |                       |           |         |         |         |
| Age (crude)            | 115                | 257                   | -0.0579   | -0.0654 | -0.0505 | <0.0001 |
| Proportion of girls    | 90                 | 192                   | -0.0467   | -0.0882 | -0.0053 | 0.027   |
| Sex                    |                    |                       |           |         |         |         |
| Girl                   | 29                 | 37                    | Reference |         |         |         |
| Boy                    | 30                 | 38                    | 0.0469    | 0.0055  | 0.0884  | 0.0264  |
| Setting                |                    |                       |           |         |         |         |
| Rural                  | 33                 | 77                    | Reference |         |         |         |
| Urban                  | 23                 | 46                    | -0.3359   | -0.3992 | -0.2727 | <0.0001 |
| SDI                    | 115                | 257                   | -4.8503   | -6.6723 | -3.0284 | <0.0001 |
| Development Region     |                    |                       |           |         |         |         |
| High-middle SDI        | 64                 | 152                   | Reference |         |         |         |
| Low-middle and low SDI | 51                 | 105                   | 0.713     | 0.1378  | 1.2883  | 0.0151  |
| WHO region             |                    |                       |           |         |         |         |
| WPR                    | 30                 | 78                    | Reference |         |         |         |
| AFR                    | 27                 | 54                    | 1.1659    | 0.3345  | 1.9973  | 0.006   |
| AMR                    | 31                 | 68                    | 0.187     | -0.703  | 1.0771  | 0.6805  |
| SEAR                   | 20                 | 45                    | 0.4193    | -0.5095 | 1.348   | 0.3762  |
| EUR                    | 2                  | 2                     | 0.1082    | -1.7339 | 1.9502  | 0.9084  |
| EMR                    | 5                  | 10                    | 0.2178    | -1.0524 | 1.488   | 0.7368  |
| Investigation period   |                    |                       |           |         |         |         |
| Before 2000            | 19                 | 41                    | Reference |         |         |         |
| 2000-2009              | 61                 | 148                   | -1.1451   | -1.7372 | -0.5529 | 0.0002  |
| 2010 and later         | 35                 | 68                    | -1.4466   | -2.0789 | -0.8143 | <0.0001 |
| Test                   |                    |                       |           |         |         |         |
| HPLC                   | 99                 | 218                   | Reference |         |         |         |
| Other/mixed            | 16                 | 39                    | -0.2173   | -0.8474 | 0.4128  | 0.4991  |
| Investigation site     |                    |                       |           |         |         |         |
| Community-based        | 72                 | 175                   | Reference |         |         |         |
| Facility-based         | 43                 | 82                    | -0.0968   | -0.5754 | 0.3819  | 0.6919  |
| <b>mVAD</b>            |                    |                       |           |         |         |         |
| Age (crude)            | 40                 | 86                    | -0.0302   | -0.0444 | -0.0159 | <0.0001 |
| Proportion of girls    | 35                 | 84                    | -0.1056   | -0.2251 | 0.0139  | 0.0833  |
| Sex                    |                    |                       |           |         |         |         |
| Girl                   | 10                 | 12                    | Reference |         |         |         |
| Boy                    | 11                 | 13                    | 0.1044    | -0.0149 | 0.2236  | 0.0863  |
| Setting                |                    |                       |           |         |         |         |
| Rural                  | 7                  | 24                    | Reference |         |         |         |
| Urban                  | 7                  | 13                    | -1.0478   | -1.1395 | -0.956  | <0.0001 |
| SDI                    | 40                 | 86                    | -1.5359   | -4.4351 | 1.3633  | 0.2991  |
| WB Region              |                    |                       |           |         |         |         |
| High-middle SDI        | 29                 | 68                    | Reference |         |         |         |
| Low-middle and low SDI | 11                 | 18                    | 0.3027    | -0.428  | 1.0333  | 0.4168  |
| WHO region             |                    |                       |           |         |         |         |
| WPR                    | 17                 | 51                    | Reference |         |         |         |
| AFR                    | 3                  | 3                     | -0.5165   | -2.0406 | 1.0077  | 0.5066  |
| AMR                    | 12                 | 20                    | -0.4664   | -1.5413 | 0.6085  | 0.395   |
| SEAR                   | 5                  | 8                     | -0.6579   | -1.9952 | 0.6793  | 0.3349  |
| EUR                    | 1                  | 1                     | 0.2284    | -2.1679 | 2.6248  | 0.8518  |
| EMR                    | 2                  | 3                     | -0.0069   | -1.7734 | 1.7597  | 0.9939  |
| Investigation period   |                    |                       |           |         |         |         |

| Moderator          | Number of articles | Number of data points | $\beta$   | 95 % CI |        | P value |
|--------------------|--------------------|-----------------------|-----------|---------|--------|---------|
| Before 2000        | 5                  | 10                    | Reference |         |        |         |
| 2000-2009          | 22                 | 60                    | -0.4329   | -1.461  | 0.5953 | 0.4093  |
| 2010 and later     | 13                 | 16                    | -0.3193   | -1.41   | 0.7714 | 0.5661  |
| Test               |                    |                       |           |         |        |         |
| HPLC               | 35                 | 76                    | Reference |         |        |         |
| Other/mixed        | 5                  | 10                    | 0.5246    | -0.4143 | 1.4636 | 0.2735  |
| Investigation site |                    |                       |           |         |        |         |
| Community-based    | 22                 | 58                    | Reference |         |        |         |
| Facility-based     | 18                 | 28                    | 0.0034    | -0.6385 | 0.6454 | 0.9916  |

Note: VAD= Vitamin A Deficiency; mVAD= Marginal Vitamin A Deficiency; SDI= Socio-demographic Index; AFR=African Region. AMR=Region of the Americas. EMR=Eastern Mediterranean Region. EUR=European Region; HPLC=High-performance liquid chromatography.



**Table S5. Detailed characteristics of the included articles (n=116)**

| ID  | Author                 | Year Published | Country    | WHO region | WB region | SDI   | Setting | Study year | Survey base     | Test                                                       | Tested sample | No. of VAD cases | No. of mVAD cases | Age range | Age-specific estimate | Sex-specific estimate |
|-----|------------------------|----------------|------------|------------|-----------|-------|---------|------------|-----------------|------------------------------------------------------------|---------------|------------------|-------------------|-----------|-----------------------|-----------------------|
| V1  | Disalvo L, et al.[1]   | 2019           | Argentina  | AMR        | UMIC      | 0.67  | Urban   | 2011       | Community-based | UFLC                                                       | 624           | 152              | 358               | 1-6y      | Yes                   | Yes                   |
| V2  | Onoja US, et al.[2]    | 2019           | Nigeria    | AFR        | LMIC      | 0.503 | Both    | 2017       | School-based    | NS                                                         | 174           | 69               | NS                | 10-19y    | Yes                   | Yes                   |
| V3  | Hanson C, et al.[3]    | 2018           | Nigeria    | AFR        | LMIC      | 0.51  | Mixed   | 2018       | Health check    | HPLC                                                       | 74            | 61               | 12                | 0-7d      | No                    | No                    |
| V4  | Ayogu R, et al.[4]     | 2018           | Nigeria    | AFR        | LMIC      | 0.51  | Rural   | 2018       | School-based    | HPLC                                                       | 90            | 46               | NS                | 6-15y     | No                    | No                    |
| V5  | Pouraram H et al.[5]   | 2018           | Iran       | EMR        | UMIC      | 0.64  | Both    | 2013       | Community-based | HPLC                                                       | 4261          | 790              | NS                | 15-23m    | No                    | Yes                   |
| V6  | Abolurin OO, et al.[6] | 2018           | Nigeria    | AFR        | LMIC      | 0.495 | Mixed   | 2016       | Health check    | HPLC                                                       | 170           | 9                | NS                | 6-59m     | Yes                   | Yes                   |
| V7  | Lima DB, et al.[7]     | 2018           | Brazil     | AMR        | UMIC      | 0.566 | Both    | 2006       | Community-based | HPLC                                                       | 3417          | 598              | NS                | 6-59m     | Yes                   | Yes                   |
| V8  | Chyne D, et al.[8]     | 2017           | India      | SEAR       | LMIC      | 0.515 | Rural   | 2014       | Community-based | Precoded special chromatography filter paper (Whatman® #1) | 197           | 116              | NS                | 1-5y      | No                    | Yes                   |
| V9  | Longvah T, et al.[9]   | 2017           | India      | SEAR       | LMIC      | 0.504 | Rural   | 2013       | Community-based | HPLC                                                       | 227           | 74               | NS                | 1-5y      | No                    | Yes                   |
| V10 | Alaofê H, et al.[10]   | 2017           | Benin      | AFR        | LMIC      | 0.318 | Rural   | 2014       | Community-based | HPLC+E LISA                                                | 626           | 210              | NS                | 6-59m     | No                    | No                    |
| V11 | Rahman S, et al.[11]   | 2017           | Bangladesh | SEAR       | LMIC      | 0.425 | Both    | 2012       | Community-based | HPLC                                                       | 873           | 179              | 491               | 6-59m     | Yes                   | No                    |

| ID  | Author                        | Year Published | Country       | WHO region | WB region | SDI   | Setting | Study year | Survey base     | Test  | Tested sample | No. of VAD cases | No. of mVAD cases | Age range | Age-specific estimate | Sex-specific estimate |
|-----|-------------------------------|----------------|---------------|------------|-----------|-------|---------|------------|-----------------|-------|---------------|------------------|-------------------|-----------|-----------------------|-----------------------|
| V12 | Alouache A, et al.[12]        | 2017           | Algeria       | AFR        | LMIC      | 0.593 | Urban   | 2009       | Community-based | HPLC  | 102           | 6                | NS                | 41-72m    | Yes                   | No                    |
| V13 | Ayogun RN, et al.[13]         | 2016           | Nigeria       | AFR        | LMIC      | 0.46  | Urban   | NS         | School-based    | TFA   | 50            | 22               | NS                | 12-18y    | Yes                   | No                    |
| V14 | Wei X, et al.[14]             | 2016           | China         | WPR        | UMIC      | 0.638 | Urban   | NS         | Community-based | HPLC  | 1928          | 53               | 274               | 7-11y     | No                    | No                    |
| V15 | Villalpano, et al.[15]        | 2015           | Mexico        | AMR        | UMIC      | 0.617 | Both    | 2012       | Community-based | HPLC  | 5693          | 478              | NS                | 1-11y     | Yes                   | No                    |
| V16 | Talsma EF, et al.[16]         | 2015           | Kenya         | AFR        | LMIC      | 0.441 | Rural   | 2010       | School-based    | HPLC  | 372           | 68               | NS                | 6-12y     | No                    | No                    |
| V17 | Marasinghe E, et al.[17]      | 2015           | Sri Lanka     | SEAR       | LMIC      | 0.636 | Urban   | NS         | Community-based | HPLC  | 340           | 130              | NS                | 2-5y      | No                    | Yes                   |
| V18 | Sandjaja, et al.[18]          | 2015           | Indonesia     | SEAR       | LMIC      | 0.601 | Rural   | 2011       | Community-based | HPLC  | 504           | 77               | NS                | 6m-12y    | No                    | No                    |
| V19 | Faber M, et al.[19]           | 2015           | South Africa  | AFR        | UMIC      | 0.647 | Both    | 2011       | Community-based | HPLC  | 747           | 78               | NS                | 1.5-6y    | No                    | No                    |
| V20 | Konstantyner T, et al.[20]    | 2014           | Brazil        | AMR        | UMIC      | 0.566 | Both    | 2006       | Community-based | NS    | 1396          | 225              | NS                | 0-2y      | Yes                   | Yes                   |
| V21 | Herrador Z, et al.[21]        | 2014           | Ethiopia      | AFR        | LIC       | 0.233 | Both    | 2009       | Community-based | HPLC  | 663           | 194              | NS                | 7-15y     | No                    | No                    |
| V22 | Ribeiro-Silva RC, et al.[22]  | 2014           | Brazil        | AMR        | UMIC      | 0.583 | Urban   | 2009       | School-based    | HPLC  | 546           | 49               | 103               | 7-14y     | No                    | No                    |
| V23 | Martínez-Torres J, et al.[23] | 2014           | Colombia      | AMR        | UMIC      | 0.574 | Both    | 2010       | Community-based | HPLC  | 4244          | 1151             | NS                | 12-59m    | Yes                   | Yes                   |
| V24 | Dong C, et al.[24]            | 2014           | China         | WPR        | UMIC      | 0.611 | Rural   | 2009       | Community-based | HPLC  | 268           | 32               | 50                | 24-60m    | Yes                   | Yes                   |
| V25 | Rohner F, et al.[25]          | 2014           | Côte d'Ivoire | AFR        | LMIC      | 0.333 | Both    | 2007       | Community-based | ELISA | 782           | 188              | NS                | 5-59m     | No                    | No                    |

| ID  | Author                          | Year Published | Country          | WHO region | WB region | SDI   | Setting | Study year | Survey base     | Test | Tested sample | No. of VAD cases | No. of mVAD cases | Age range | Age-specific estimate | Sex-specific estimate |
|-----|---------------------------------|----------------|------------------|------------|-----------|-------|---------|------------|-----------------|------|---------------|------------------|-------------------|-----------|-----------------------|-----------------------|
| V26 | Rojroongwasinkul N, et al.[26]  | 2013           | Thailand         | SEAR       | UMIC      | 0.643 | Both    | 2011       | Community-based | HPLC | 628           | 212              | 17                | 0.5-12.9y | Yes                   | No                    |
| V27 | Poh BK, et al.[27]              | 2013           | Malaysia         | WPR        | UMIC      | 0.698 | Both    | 2011       | Community-based | HPLC | 1765          | 77               | NS                | 6m-12y    | Yes                   | Yes                   |
| V28 | Queiroz D, et al.[28]           | 2013           | Brazil           | AMR        | UMIC      | 0.572 | Urban   | 2007       | Community-based | HPLC | 1211          | 265              | 652               | 6-59m     | Yes                   | Yes                   |
| V29 | Lailou A, et al.[29]            | 2012           | Vietnam          | WPR        | LMIC      | 0.549 | Both    | 2010       | Community-based | HPLC | 546           | 55               | 258               | 6-75m     | Yes                   | No                    |
| V30 | Hotz C, et al.[30]              | 2012           | Zambia           | AFR        | LMIC      | 0.407 | Rural   | 2009       | Community-based | HPLC | 574           | 273              | NS                | 2-5y      | No                    | No                    |
| V31 | Laxmaiah A, et al.[31]          | 2012           | India            | SEAR       | LMIC      | 0.421 | Rural   | 2004       | Community-based | HPLC | 71591         | 1647             | NS                | 1-4y      | Yes                   | Yes                   |
| V32 | Van Stuijvenberg ME, et al.[32] | 2012           | South Africa     | AFR        | UMIC      | 0.632 | Mixed   | 2008       | Health check    | HPLC | 243           | 14               | NS                | 1-6y      | No                    | No                    |
| V33 | Engle-Stone R, et al.[33]       | 2011           | Cameroon         | AFR        | LMIC      | 0.39  | Both    | NS         | Community-based | HPLC | 838           | 277              | NS                | 12-59m    | No                    | Yes                   |
| V34 | Temple VJ, et al.[34]           | 2011           | Papua New Guinea | WPR        | LMIC      | 0.348 | Urban   | 2008       | Health check    | HPLC | 132           | 35               | 37                | 6-59m     | Yes                   | Yes                   |
| V35 | Arlappa N, et al.[35]           | 2011           | India            | SEAR       | LMIC      | 0.414 | Rural   | 2003       | Community-based | HPLC | 590           | 354              | NS                | 3-5y      | Yes                   | Yes                   |
| V36 | Arlappa N, et al.[36]           | 2011           | India            | SEAR       | LMIC      | 0.414 | Rural   | 2003       | Community-based | HPLC | 407           | 358              | NS                | 1y-5y     | Yes                   | Yes                   |
| V37 | Fares S, et al.[37]             | 2011           | Tunisia          | EMR        | LMIC      | 0.599 | Both    | NS         | School-based    | HPLC | 6677          | 154              | 1135              | 5-7y      | Yes                   | No                    |
| V38 | Durán P, et al.[38]             | 2011           | Argentina        | AMR        | UMIC      | 0.649 | Mixed   | 2005       | Community-based | HPLC | 32474         | 4644             | 195               | 6m-5y     | No                    | No                    |

| ID  | Author                       | Year Published | Country   | WHO region | WB region | SDI   | Setting | Study year | Survey base     | Test | Tested sample | No. of VAD cases | No. of mVAD cases | Age range | Age-specific estimate | Sex-specific estimate |
|-----|------------------------------|----------------|-----------|------------|-----------|-------|---------|------------|-----------------|------|---------------|------------------|-------------------|-----------|-----------------------|-----------------------|
| V39 | Dillon D, et al.[39]         | 2010           | Indonesia | SEAR       | LMIC      | 0.537 | Mixed   | 2001       | School-based    | HPLC | 54            | 10               | NS                | 6-12y     | No                    | Yes                   |
| V40 | Custodio VI, et al.[40]      | 2009           | Brazil    | AMR        | UMIC      | 0.556 | Mixed   | 2004       | Health check    | HPLC | 103           | 6                | 21                | 5.5-11y   | Yes                   | Yes                   |
| V41 | Khatib IMD, et al.[41]       | 2009           | Jordan    | EMR        | UMIC      | 0.63  | Rural   | 2004       | Health check    | HPLC | 262           | 66               | 138               | 6-66m     | No                    | Yes                   |
| V42 | Tatala SR, et al.[42]        | 2008           | Tanzania  | AFR        | LMIC      | 0.284 | Mixed   | 1996       | School-based    | HPLC | 798           | 255              | 28                | 7-14y     | Yes                   | No                    |
| V43 | Jiang JX, et al.[43]         | 2008           | China     | WPR        | UMIC      | 0.525 | Both    | 2000       | Community-based | NS   | 1236          | 97               | 373               | 0-71m     | Yes                   | No                    |
| V44 | Calis JCJ, et al.[44]        | 2008           | Malawi    | AFR        | LIC       | 0.26  | Both    | 2003       | Community-based | HPLC | 262           | 172              | NS                | 6-60m     | No                    | No                    |
| V45 | Al-Mekhlafi MH, et al.[45]   | 2007           | Malaysia  | WPR        | UMIC      | 0.659 | Rural   | 2004       | Community-based | HPLC | 281           | 71               | NS                | 2-15y     | Yes                   | Yes                   |
| V46 | Yang R, et al.[46]           | 2007           | China     | WPR        | UMIC      | 0.581 | Both    | 2006       | Community-based | HPLC | 357           | 11               | 26                | 0-59m     | No                    | Yes                   |
| V47 | Khan NC, et al.[47]          | 2007           | Vietnam   | WPR        | LMIC      | 0.493 | Mixed   | NS         | Community-based | HPLC | 1657          | 199              | NS                | 0-5y      | No                    | No                    |
| V48 | Jiang J, et al.[48]          | 2006           | China     | WPR        | UMIC      | 0.525 | Both    | 2000       | Community-based | HPLC | 7826          | 957              | 3140              | 1-6y      | Yes                   | NO                    |
| V49 | Hix J, et al.[49]            | 2006           | Cambodia  | WPR        | LMIC      | 0.328 | Mixed   | 2001       | Community-based | HPLC | 359           | 80               | NS                | 6-59m     | NO                    | NO                    |
| V50 | Maziya-Dixon B.B, et al.[50] | 2006           | Nigeria   | AFR        | LMIC      | 0.356 | Both    | 2001       | Community-based | HPLC | 3099          | 882              | NS                | 0-5y      | NO                    | NO                    |
| V51 | Thurlow R.A, et al.[51]      | 2005           | Thailand  | SEAR       | UMIC      | 0.594 | Rural   | 2002       | School-based    | HPLC | 481           | 19               | NS                | 6-12.9y   | NO                    | NO                    |

| ID  | Author                   | Year Published | Country          | WHO region | WB region | SDI   | Setting | Study year | Survey base     | Test                      | Tested sample | No. of VAD cases | No. of mVAD cases | Age range | Age-specific estimate | Sex-specific estimate |
|-----|--------------------------|----------------|------------------|------------|-----------|-------|---------|------------|-----------------|---------------------------|---------------|------------------|-------------------|-----------|-----------------------|-----------------------|
| V52 | Santos M.A, et al.[52]   | 2005           | Brazil           | AMR        | UMIC      | 0.543 | Rural   | NS         | School-based    | Spectrophotometric method | 241           | 70               | NS                | 6-14y     | NO                    | NO                    |
| V53 | Nasri I, et al.[53]      | 2004           | Morocco          | EMR        | LMIC      | 0.409 | Mixed   | NS         | Community-based | HPLC                      | 1453          | 587              | NS                | 6-72m     | NO                    | NO                    |
| V54 | Coles C.L, et al.[54]    | 2004           | Israel           | EUR        | HIC       | 0.742 | Mixed   | 1996       | Health check    | HPLC                      | 117           | 18               | 47                | 0-18m     | NO                    | NO                    |
| V55 | Gamble M.V, et al.[55]   | 2004           | Marshall Islands | WPR        | UMIC      | 0.423 | Mixed   | 1994       | Community-based | HPLC                      | 367           | 201              | NS                | 1-5y      | NO                    | NO                    |
| V56 | Yamamura C.M, et al.[56] | 2004           | Micronesia       | WPR        | LMIC      | 0.465 | Rural   | 1993       | Community-based | HPLC                      | 354           | 189              | NS                | 24-48m    | No                    | No                    |
| V57 | Villalpano S, et al.[57] | 2003           | Mexico           | AMR        | UMIC      | 0.558 | Both    | 1999       | Community-based | HPLC                      | 1709          | NS               | NS                | 1-12y     | No                    | No                    |
| V58 | Adelekan D.A, et al.[58] | 2003           | Nigeria          | AFR        | LMIC      | 0.334 | Mixed   | 1997       | Health check    | HPLC                      | 192           | 138              | NS                | 1-20d     | No                    | No                    |
| V59 | Oso O.O, et al.[59]      | 2003           | Nigeria          | AFR        | LMIC      | 0.315 | Rural   | 1993       | Health check    | HPLC                      | 213           | 159              | NS                | 6-72m     | Yes                   | No                    |
| V60 | Palafox N.A, et al.[60]  | 2003           | Marshall Islands | WPR        | UMIC      | 0.43  | Mixed   | 1995       | Community-based | HPLC                      | 904           | 543              | NS                | 1-5y      | No                    | No                    |
| V61 | Tan Z, et al.[61]        | 2002           | China            | WPR        | UMIC      | 0.525 | Both    | 2000       | Community-based | Fluorescence method       | 8669          | 1018             | NS                | 0-6y      | Yes                   | No                    |
| V62 | Schéman J.F, et al.[62]  | 2002           | Mali             | AFR        | LIC       | 0.151 | Both    | 1997       | Community-based | HPLC                      | 192           | 178              | NS                | 6-72m     | No                    | No                    |
| V63 | Swami H.M, et al.[63]    | 2001           | India            | SEAR       | LMIC      | 0.393 | Mixed   | 2000       | Community-based | HPLC                      | 190           | 49               | NS                | 1-5y      | No                    | No                    |
| V64 | Centers for Disease      | 2001           | Micronesia       | WPR        | LMIC      | 0.502 | Rural   | 2000       | Community-based | HPLC                      | 485           | 237              | NS                | 24-59m    | No                    | No                    |

| ID  | Author                                          | Year Published | Country  | WHO region | WB region | SDI   | Setting | Study year | Survey base     | Test | Tested sample | No. of VAD cases | No. of mVAD cases | Age range | Age-specific estimate | Sex-specific estimate |
|-----|-------------------------------------------------|----------------|----------|------------|-----------|-------|---------|------------|-----------------|------|---------------|------------------|-------------------|-----------|-----------------------|-----------------------|
| V65 | Control Prevention[64]<br>Kassaye T, et al.[65] | 2001           | Ethiopia | AFR        | LIC       | 0.161 | Mixed   | 1997       | Health check    | HPLC | 824           | 490              | NS                | 6-9y      | Yes                   | Yes                   |
| V66 | Centers for Disease Control Prevention[66]      | 1999           | Nepal    | SEAR       | LMIC      | 0.259 | Mixed   | 1999       | Health check    | HPLC | 190           | 49               | NS                | 10-19y    | NO                    | NO                    |
| V67 | Ferraz I.S, et al.[67]                          | 2000           | Brazil   | AMR        | UMIC      | 0.524 | Urban   | 1997       | Health check    | HPLC | 103           | 22               | NS                | 6-24m     | Yes                   | Yes                   |
| V68 | Li X.C, et al.[68]                              | 2020           | China    | WPR        | UMIC      | 0.611 | Mixed   | 2009       | Community-based | HPLC | 688           | 194              | NS                | New-born  | No                    | No                    |
| V69 | Zhang Z, et al.[69]                             | 2018           | China    | WPR        | UMIC      | 0.659 | Urban   | 2016       | School-based    | HPLC | 2085          | 31               | 647               | 3-6y      | No                    | No                    |
| V70 | Gubert M.B, et al.[70]                          | 2016           | Brazil   | AMR        | UMIC      | 0.566 | Both    | 2006       | Community-based | HPLC | 3425          | 506              | NS                | 0-59m     | No                    | No                    |
| V71 | Jin C, et al.[71]                               | 2016           | China    | WPR        | UMIC      | 0.657 | Both    | 2015       | Health check    | HPLC | 1538          | 80               | 724               | 1m-16y    | Yes                   | No                    |
| V72 | Pajuelo J, et al.[72]                           | 2015           | Peru     | AMR        | UMIC      | 0.595 | Both    | 2009       | Community-based | HPLC | 1465          | 175              | NS                | 0-59m     | Yes                   | Yes                   |
| V73 | De Moura F.F, et al.[73]                        | 2015           | Nigeria  | AFR        | LMIC      | 0.451 | Both    | 2011       | Community-based | HPLC | 549           | 93               | NS                | 6-59m     | No                    | No                    |
| V74 | Kurihaya shi A.Y, et al.[74]                    | 2015           | Brazil   | AMR        | UMIC      | 0.61  | Mixed   | 2013       | Health check    | HPLC | 84            | 10               | 5                 | 2-7y      | No                    | No                    |
| V75 | Augusto R.A, et al.[75]                         | 2015           | Brazil   | AMR        | UMIC      | 0.572 | Mixed   | 2007       | School-based    | HPLC | 702           | 104              | NS                | 4-10y     | No                    | No                    |

| ID  | Author                   | Year Published | Country     | WHO region | WB region | SDI   | Setting | Study year | Survey base     | Test | Tested sample | No. of VAD cases | No. of mVAD cases | Age range  | Age-specific estimate | Sex-specific estimate |
|-----|--------------------------|----------------|-------------|------------|-----------|-------|---------|------------|-----------------|------|---------------|------------------|-------------------|------------|-----------------------|-----------------------|
| V76 | Peng R, et al.[76]       | 2014           | China       | WPR        | UMIC      | 0.638 | Mixed   | 2012       | School-based    | HPLC | 492           | 44               | 214               | 3.69-5.41y | No                    | No                    |
| V77 | de Paula W.K, et al.[77] | 2014           | Brazil      | AMR        | UMIC      | 0.566 | Mixed   | 2006       | Health check    | HPLC | 563           | 90               | NS                | 6-59m      | Yes                   | Yes                   |
| V78 | Rohner F, et al.[78]     | 2013           | Philippines | WPR        | UMIC      | 0.558 | Urban   | 2008       | Community-based | HPLC | 1784          | 146              | NS                | 6-23m      | No                    | No                    |
| V79 | Miglioli T.C, et al.[79] | 2013           | Brazil      | AMR        | UMIC      | 0.566 | Both    | 2006       | Community-based | HPLC | 608           | 42               | NS                | 6-59m      | Yes                   | Yes                   |
| V80 | Fan P, et al.[80]        | 2012           | China       | WPR        | UMIC      | 0.611 | Rural   | 2009       | Community-based | HPLC | 254           | 103              | 83                | 6-24m      | Yes                   | No                    |
| V81 | Garcia M.T, et al.[81]   | 2011           | Brazil      | AMR        | UMIC      | 0.572 | Urban   | 2007       | Community-based | HPLC | 164           | 24               | NS                | 6-24m      | No                    | No                    |
| V82 | Midyat L, et al.[82]     | 2011           | Turkey      | EUR        | UMIC      | 0.641 | Both    | 2006       | Community-based | HPLC | 101           | 20               | NS                | 24-59m     | NO                    | NO                    |
| V83 | Azevedo M.M, et al.[83]  | 2010           | Brazil      | AMR        | UMIC      | 0.572 | Both    | 2007       | School-based    | HPLC | 333           | 26               | 99                | 24-60m     | NO                    | NO                    |
| V84 | Demissie T, et al.[84]   | 2010           | Ethiopia    | AFR        | LIC       | 0.203 | Both    | 2006       | Community-based | HPLC | 965           | 329              | NS                | 6-71m      | NO                    | NO                    |
| V85 | Khatib I.M, et al.[85]   | 2009           | Jordan      | EMR        | UMIC      | 0.639 | Rural   | NS         | School-based    | HPLC | 560           | 165              | 338               | 5.5-10y    | NO                    | Yes                   |
| V86 | Durán P, et al.[86]      | 2009           | Argentina   | AMR        | UMIC      | 0.649 | Mixed   | 2005       | Community-based | HPLC | 30514         | 4363             | NS                | 6m-72m     | NO                    | NO                    |
| V87 | Maslova E, et al.[87]    | 2009           | Colombia    | AMR        | UMIC      | 0.546 | Mixed   | 2006       | School-based    | HPLC | 2810          | 385              | 1189              | 5-12y      | Yes                   | Yes                   |
| V88 | Leal J.Y, et al.[88]     | 2007           | Venezuela   | AMR        | UMIC      | 0.566 | Both    | 2007       | School-based    | HPLC | 73            | 5                | 30                | 13-19y     | NO                    | NO                    |
| V89 | Graebner I.T, et al.[89] | 2007           | Brazil      | AMR        | UMIC      | 0.551 | Rural   | 2003       | School-based    | HPLC | 155           | 52               | NS                | 5-18y      | Yes                   | NO                    |

| ID   | Author                       | Year Published | Country      | WHO region | WB region | SDI   | Setting | Study year | Survey base     | Test                               | Tested sample | No. of VAD cases | No. of mVAD cases | Age range | Age-specific estimate | Sex-specific estimate |
|------|------------------------------|----------------|--------------|------------|-----------|-------|---------|------------|-----------------|------------------------------------|---------------|------------------|-------------------|-----------|-----------------------|-----------------------|
| V90  | Poveda E, et al.[90]         | 2007           | Colombia     | AMR        | UMIC      | 0.552 | Both    | 2007       | School-based    | HPLC                               | 267           | 12               | 96                | 2-5y      | No                    | Yes                   |
| V91  | de Souza V.D.S.L, et al.[91] | 2007           | Brazil       | AMR        | UMIC      | 0.547 | Urban   | 2002       | Community-based | HPLC                               | 422           | NS               | 42                | 7-17y     | Yes                   | Yes                   |
| V92  | Zhang Y, et al.[92]          | 2007           | China        | WPR        | UMIC      | 0.543 | Both    | 2002       | Community-based | HPLC                               | 1052          | 72               | 477               | 0-5y      | Yes                   | Yes                   |
| V93  | Faruque A.S, et al.[93]      | 2006           | Bangladesh   | SEAR       | LMIC      | 0.324 | Rural   | 1998       | Community-based | HPLC                               | 1302          | 255              | 466               | 2-6y      | No                    | Yes                   |
| V94  | Paiva A.A, et al.[94]        | 2006           | Brazil       | AMR        | UMIC      | 0.547 | Both    | NS         | School-based    | HPLC                               | 631           | 97               | 183               | 36-83m    | No                    | Yes                   |
| V95  | Li J.H, et al.[95]           | 2006           | China        | WPR        | UMIC      | 0.543 | Both    | 2002       | Community-based | HPLC                               | 380           | 32               | 170               | 3-12y     | NO                    | NO                    |
| V96  | Ahmed F, et al.[96]          | 2006           | Bangladesh   | SEAR       | LMIC      | 0.336 | Urban   | 2000       | School-based    | HPLC                               | 381           | 6                | 84                | 11-16y    | NO                    | Yes                   |
| V97  | Ferraz I.S, et al.[97]       | 2005           | Brazil       | AMR        | UMIC      | 0.538 | Mixed   | 2000       | Health check    | HPLC                               | 179           | 135              | NS                | 2-6y      | NO                    | NO                    |
| V98  | Monge-Rojas R, et al.[98]    | 2005           | India        | SEAR       | LMIC      | 0.4   | Mixed   | NS         | School-based    | HPLC                               | 84            | 1                | 8                 | 10-16y    | NO                    | Yes                   |
| V99  | Sibeko L.N, et al.[99]       | 2004           | South Africa | AFR        | UMIC      | 0.593 | Urban   | 2000       | Health check    | HPLC                               | 113           | 11               | NS                | 1-6m      | NO                    | NO                    |
| V100 | Martins M.C, et al.[100]     | 2004           | Brazil       | AMR        | UMIC      | 0.529 | Both    | 1998       | Community-based | HPLC                               | 607           | 195              | NS                | 6-60m     | Yes                   | Yes                   |
| V101 | Castejon H.V, et al.[101]    | 2004           | Venezuela    | AMR        | UMIC      | 0.548 | Urban   | 2004       | Community-based | HPLC                               | 202           | 44               | NS                | 24-84m    | Yes                   | NO                    |
| V102 | Mi J, et al.[102]            | 2003           | China        | WPR        | UMIC      | 0.534 | Both    | 2001       | Community-based | Microfluorescent spectrophotometry | 1257          | 106              | 483               | 0-6y      | Yes                   | NO                    |



| ID   | Author                           | Year Published | Country      | WHO region | WB region | SDI   | Setting | Study year | Survey base     | Test | Tested sample | No. of VAD cases | No. of mVAD cases | Age range | Age-specific estimate | Sex-specific estimate |
|------|----------------------------------|----------------|--------------|------------|-----------|-------|---------|------------|-----------------|------|---------------|------------------|-------------------|-----------|-----------------------|-----------------------|
| V103 | Lin L, et al.[103]               | 2002           | China        | WPR        | UMIC      | 0.525 | Both    | 2000       | Community-based | HPLC | 8669          | 1018             | 3396              | 0-6y      | Yes                   | Yes                   |
| V104 | Amaya-Castellanos D, et al.[104] | 2002           | Venezuela    | AMR        | UMIC      | 0.554 | Both    | NS         | School-based    | HPLC | 207           | 46               | 51                | 24-85m    | Yes                   | NO                    |
| V105 | Oelofse A, et al.[105]           | 2002           | South Africa | AFR        | UMIC      | 0.584 | Urban   | 1998       | Community-based | HPLC | 42            | 1                | NS                | 6-12m     | NO                    | NO                    |
| V106 | Jinabhai C.C, et al.[106]        | 2001           | South Africa | AFR        | UMIC      | 0.58  | Rural   | NS         | School-based    | HPLC | 335           | 116              | 132               | 8-10y     | Yes                   | NO                    |
| V107 | Dijkhuizen M.A, et al.[107]      | 2001           | Indonesia    | SEAR       | LMIC      | 0.508 | Rural   | 1996       | Health check    | HPLC | 155           | 84               | NS                | 2.4-10.5y | NO                    | NO                    |
| V108 | Albalak R, et al.[108]           | 2000           | Honduras     | AMR        | LMIC      | 0.363 | Mixed   | 1996       | Community-based | HPLC | 1243          | 553              | 560               | 12-60m    | Yes                   | NO                    |
| V109 | Gowele VF, et al.[109]           | 2021           | Tanzania     | AFR        | LMIC      | 0.399 | Rural   | 2016       | Community-based | HPLC | 666           | 166              | NS                | 5-10y     | NO                    | NO                    |
| V110 | Reddy GB, et al.[110]            | 2022           | India        | SEAR       | LMIC      | 0.547 | Both    | 2017       | Community-based | NS   | 20122         | 3397             |                   | 5-19y     | Yes                   | Yes                   |
| V111 | De Castro IRR, et al.[111]       | 2021           | Brazil       | AMR        | UMIC      | 0.616 | Urban   | 2014       | Community-based | HPLC | 536           | 68               | NS                | 6-59m     | Yes                   | NO                    |
| V112 | Reddy GB, et al.[112]            | 2021           | India        | SEAR       | LMIC      | 0.547 | Both    | 2017       | Community-based | NS   | 9563          | 1510             | NS                | 1-5y      | Yes                   | Yes                   |
| V113 | Tian T, et al.[113]              | 2022           | China        | WPR        | UMIC      | 0.669 | Mixed   | 2017       | Community-based | NS   | 3025          | 27               | 441               | 7-17y     | NO                    | Yes                   |
| V114 | Janmohamed A, et al.[114]        | 2020           | Mongolia     | WPR        | LMIC      | 0.597 | Mixed   | 2017       | Community-based | NS   | 938           | 109              | 420               | 6-23m     | NO                    | NO                    |

| ID   | Author                  | Year Published | Country   | WHO region | WB region | SDI   | Setting | Study year | Survey base     | Test | Tested sample | No. of VAD cases | No. of mVAD cases | Age range    | Age-specific estimate | Sex-specific estimate |
|------|-------------------------|----------------|-----------|------------|-----------|-------|---------|------------|-----------------|------|---------------|------------------|-------------------|--------------|-----------------------|-----------------------|
| V115 | Shan X, et al.[115]     | 2021           | China     | WPR        | UMIC      | 0.659 | Mixed   | 2016       | Community-based | HPLC | 3808          | 126              | 769               | mean: 11.32y | NO                    | Yes                   |
| V116 | Ernawati F, et al.[116] | 2021           | Indonesia | SEAR       | LMIC      | 0.601 | Mixed   | 2011       | Community-based | HPLC | 1008          | 15               | NS                | mean: 31.7m  | NO                    | NO                    |

Note: WHO=the World Health Organization; AFR=African region; AMR=region of the Americas; SEAR=South-East Asia region; EUR=European region; EMR=Eastern Mediterranean region; WPR=Western Pacific region; WB region=the World Bank region; LMIC=Low- and Middle-Income Country; UMIC=Upper Middle-Income Country; SDI=Socio-demographic Index; NS= Not Stated; UFLC= Ultra High Performance Liquid Chromatography; HPLC=High-Performance Liquid Chromatography; ELISA=Enzyme-linked Immunosorbent Assay; TFA=Trifluoroacetic Acid; VAD= Vitamin A Deficiency; mVAD= Marginal Vitamin A Deficiency; d=day; y=year; m=month.

**Table S6. Quality scores for assessing the risk of bias in the included articles (n=116)**

| ID  | Author                         | Year Published | Quality score     |             |               |                    |                    |              |
|-----|--------------------------------|----------------|-------------------|-------------|---------------|--------------------|--------------------|--------------|
|     |                                |                | Sample population | Sample size | Participation | Outcome assessment | Analytical methods | Total scores |
| V1  | Disalvo L, et al.[1]           | 2019           | 2                 | 1           | 2             | 2                  | 2                  | 9            |
| V2  | Onoja U S, et al.[2]           | 2019           | 2                 | 1           | 2             | 2                  | 2                  | 9            |
| V3  | Hanson C, et al.[3]            | 2018           | 2                 | 1           | 2             | 2                  | 2                  | 9            |
| V4  | Ayogu R, et al.[4]             | 2018           | 2                 | 2           | 2             | 2                  | 2                  | 10           |
| V5  | Pouraram H et al.[5]           | 2018           | 2                 | 2           | 2             | 2                  | 2                  | 10           |
| V6  | Abolurin OO, et al.[6]         | 2018           | 2                 | 1           | 0             | 2                  | 2                  | 7            |
| V7  | Lima DB, et al.[7]             | 2018           | 2                 | 2           | 0             | 2                  | 2                  | 8            |
| V8  | Chyne D, et al.[8]             | 2017           | 2                 | 1           | 2             | 2                  | 2                  | 9            |
| V9  | Longvah T, et al.[9]           | 2017           | 2                 | 2           | 2             | 2                  | 2                  | 10           |
| V10 | Alaofè H, et al.[10]           | 2017           | 2                 | 1           | 2             | 2                  | 2                  | 9            |
| V11 | Rahman S, et al.[11]           | 2017           | 2                 | 2           | 1             | 2                  | 2                  | 9            |
| V12 | Alouache A, et al.[12]         | 2017           | 1                 | 1           | 2             | 2                  | 1                  | 7            |
| V13 | Ayogu RN, et al.[13]           | 2016           | 1                 | 0           | 2             | 2                  | 2                  | 7            |
| V14 | Wei X, et al.[14]              | 2016           | 2                 | 2           | 2             | 2                  | 2                  | 10           |
| V15 | Villalpando, et al.[15]        | 2015           | 1                 | 0           | 2             | 1                  | 2                  | 6            |
| V16 | Talsma EF, et al.[16]          | 2015           | 2                 | 1           | 2             | 2                  | 2                  | 9            |
| V17 | Marasinghe E, et al.[17]       | 2015           | 1                 | 1           | 2             | 2                  | 2                  | 8            |
| V18 | Sandjaja, et al.[18]           | 2015           | 1                 | 1           | 2             | 2                  | 0                  | 6            |
| V19 | Faber M, et al.[19]            | 2015           | 2                 | 2           | 2             | 2                  | 2                  | 10           |
| V20 | Konstantyner T, et al.[20]     | 2014           | 2                 | 1           | 2             | 1                  | 2                  | 8            |
| V21 | Herrador Z, et al.[21]         | 2014           | 2                 | 1           | 2             | 2                  | 2                  | 9            |
| V22 | Ribeiro-Silva RC, et al.[22]   | 2014           | 2                 | 2           | 2             | 2                  | 2                  | 10           |
| V23 | Martínez-Torres J, et al.[23]  | 2014           | 2                 | 1           | 0             | 2                  | 2                  | 7            |
| V24 | Dong C, et al.[24]             | 2014           | 2                 | 1           | 2             | 2                  | 2                  | 9            |
| V25 | Rohner F, et al.[25]           | 2014           | 2                 | 1           | 2             | 2                  | 1                  | 8            |
| V26 | Rojroongwasinkul N, et al.[26] | 2013           | 1                 | 1           | 2             | 2                  | 2                  | 8            |
| V27 | Poh BK, et al.[27]             | 2013           | 2                 | 2           | 2             | 2                  | 1                  | 9            |
| V28 | Queiroz D, et al.[28]          | 2013           | 1                 | 1           | 2             | 2                  | 2                  | 8            |
| V29 | Laillou A, et al.[29]          | 2012           | 2                 | 0           | 2             | 2                  | 0                  | 6            |

| ID  | Author                          | Year Published | Quality score     |             |               |                    |                    |              |
|-----|---------------------------------|----------------|-------------------|-------------|---------------|--------------------|--------------------|--------------|
|     |                                 |                | Sample population | Sample size | Participation | Outcome assessment | Analytical methods | Total scores |
| V30 | Hotz C, et al.[30]              | 2012           | 2                 | 1           | 0             | 2                  | 2                  | 7            |
| V31 | Laxmaiah A, et al.[31]          | 2012           | 2                 | 1           | 2             | 1                  | 2                  | 5            |
| V32 | Van Stuijvenberg ME, et al.[32] | 2012           | 2                 | 1           | 2             | 2                  | 2                  | 9            |
| V33 | Engle-Stone R, et al.[33]       | 2011           | 1                 | 0           | 2             | 2                  | 2                  | 7            |
| V34 | Temple VJ, et al.[34]           | 2011           | 2                 | 1           | 2             | 2                  | 2                  | 9            |
| V35 | Arlappa N, et al.[35]           | 2011           | 2                 | 1           | 2             | 2                  | 1                  | 8            |
| V36 | Arlappa N, et al.[36]           | 2011           | 1                 | 0           | 2             | 2                  | 2                  | 7            |
| V37 | Fares S, et al.[37]             | 2011           | 2                 | 1           | 2             | 2                  | 2                  | 9            |
| V38 | Durán P, et al.[38]             | 2011           | 2                 | 1           | 1             | 2                  | 1                  | 7            |
| V39 | Dillon D, et al.[39]            | 2010           | 1                 | 0           | 2             | 2                  | 2                  | 7            |
| V40 | Custodio VI, et al.[40]         | 2009           | 2                 | 1           | 2             | 2                  | 1                  | 8            |
| V41 | Khatib IMD, et al.[41]          | 2009           | 2                 | 1           | 2             | 2                  | 2                  | 9            |
| V42 | Tatala SR, et al.[42]           | 2008           | 2                 | 1           | 2             | 2                  | 2                  | 9            |
| V43 | Jiang JX, et al.[43]            | 2008           | 2                 | 2           | 2             | 2                  | 1                  | 9            |
| V44 | Calis JCJ, et al.[44]           | 2008           | 1                 | 0           | 2             | 2                  | 2                  | 7            |
| V45 | Al-Mekhlafi MH, et al.[45]      | 2007           | 2                 | 1           | 2             | 2                  | 2                  | 9            |
| V46 | Yang R, et al.[46]              | 2007           | 2                 | 1           | 2             | 2                  | 2                  | 9            |
| V47 | Khan NC, et al.[47]             | 2007           | 2                 | 1           | 2             | 2                  | 2                  | 9            |
| V48 | Jiang J, et al.[48]             | 2006           | 2                 | 1           | 2             | 2                  | 2                  | 9            |
| V49 | Hix J, et al.[49]               | 2006           | 2                 | 2           | 2             | 2                  | 1                  | 9            |
| V50 | Maziya-Dixon B.B, et al.[50]    | 2006           | 2                 | 2           | 1             | 2                  | 1                  | 8            |
| V51 | Thurlow R.A, et al.[51]         | 2005           | 2                 | 2           | 0             | 2                  | 2                  | 8            |
| V52 | Santos M.A, et al.[52]          | 2005           | 2                 | 0           | 2             | 2                  | 1                  | 7            |
| V53 | Nasri I, et al.[53]             | 2004           | 1                 | 1           | 0             | 1                  | 1                  | 4            |
| V54 | Coles C.L, et al.[54]           | 2004           | 1                 | 2           | 2             | 2                  | 2                  | 9            |
| V55 | Gamble M.V, et al.[55]          | 2004           | 2                 | 1           | 0             | 2                  | 1                  | 6            |
| V56 | Yamamura C.M, et al.[56]        | 2004           | 1                 | 2           | 2             | 2                  | 2                  | 9            |
| V57 | Villalpando S, et al.[57]       | 2003           | 2                 | 1           | 2             | 2                  | 1                  | 8            |
| V58 | Adelekan D.A, et al.[58]        | 2003           | 2                 | 1           | 0             | 2                  | 2                  | 7            |
| V59 | Oso O.O, et al.[59]             | 2003           | 2                 | 1           | 2             | 2                  | 1                  | 8            |

| ID  | Author                                     | Year Published | Quality score     |             |               |                    |                    |              |
|-----|--------------------------------------------|----------------|-------------------|-------------|---------------|--------------------|--------------------|--------------|
|     |                                            |                | Sample population | Sample size | Participation | Outcome assessment | Analytical methods | Total scores |
| V60 | Palafox N.A, et al.[60]                    | 2003           | 1                 | 1           | 2             | 2                  | 1                  | 7            |
| V61 | Tan Z, et al.[61]                          | 2002           | 2                 | 2           | 1             | 2                  | 2                  | 9            |
| V62 | Schémann J.F, et al.[62]                   | 2002           | 2                 | 2           | 0             | 2                  | 1                  | 7            |
| V63 | Swami H.M, et al.[63]                      | 2001           | 2                 | 2           | 0             | 2                  | 1                  | 7            |
| V64 | Centers for Disease Control Prevention[64] | 2001           | 2                 | 1           | 2             | 2                  | 1                  | 8            |
| V65 | Kassaye T, et al.[65]                      | 2001           | 2                 | 2           | 0             | 2                  | 1                  | 7            |
| V66 | Centers for Disease Control Prevention[66] | 1999           | 2                 | 1           | 0             | 1                  | 1                  | 5            |
| V67 | Ferraz I.S, et al.[67]                     | 2000           | 2                 | 1           | 0             | 2                  | 1                  | 6            |
| V68 | Li X.C, et al.[68]                         | 2020           | 2                 | 2           | 1             | 2                  | 2                  | 9            |
| V69 | Zhang Z, et al.[69]                        | 2018           | 2                 | 1           | 2             | 2                  | 2                  | 9            |
| V70 | Gubert M.B, et al.[70]                     | 2016           | 2                 | 1           | 1             | 2                  | 1                  | 7            |
| V71 | Jin C, et al.[71]                          | 2016           | 2                 | 1           | 2             | 2                  | 1                  | 8            |
| V72 | Pajuelo J, et al.[72]                      | 2015           | 2                 | 1           | 2             | 2                  | 1                  | 8            |
| V73 | De Moura F.F, et al.[73]                   | 2015           | 2                 | 1           | 2             | 2                  | 2                  | 9            |
| V74 | Kurihayashi A.Y, et al.[74]                | 2015           | 2                 | 2           | 1             | 2                  | 2                  | 9            |
| V75 | Augusto R.A, et al.[75]                    | 2015           | 2                 | 1           | 2             | 2                  | 2                  | 9            |
| V76 | Peng R, et al.[76]                         | 2014           | 2                 | 1           | 2             | 2                  | 2                  | 9            |
| V77 | de Paula W.K, et al.[77]                   | 2014           | 2                 | 1           | 1             | 2                  | 2                  | 8            |
| V78 | Rohner F, et al.[78]                       | 2013           | 2                 | 1           | 2             | 2                  | 2                  | 9            |
| V79 | Miglioli T.C, et al.[79]                   | 2013           | 2                 | 1           | 2             | 1                  | 1                  | 7            |
| V80 | Fan P, et al.[80]                          | 2012           | 2                 | 1           | 2             | 2                  | 1                  | 8            |
| V81 | Garcia M.T, et al.[81]                     | 2011           | 1                 | 1           | 2             | 1                  | 1                  | 6            |
| V82 | Midyat L, et al.[82]                       | 2011           | 2                 | 0           | 0             | 2                  | 1                  | 5            |
| V83 | Azevedo M.M, et al.[83]                    | 2010           | 2                 | 2           | 2             | 2                  | 1                  | 9            |
| V84 | Demissie T, et al.[84]                     | 2010           | 2                 | 0           | 2             | 2                  | 1                  | 7            |
| V85 | Khatib I.M, et al.[85]                     | 2009           | 2                 | 1           | 1             | 2                  | 1                  | 7            |
| V86 | Durán P, et al.[86]                        | 2009           | 1                 | 1           | 1             | 1                  | 1                  | 5            |
| V87 | Maslova E, et al.[87]                      | 2009           | 2                 | 1           | 1             | 2                  | 2                  | 8            |

| ID   | Author                           | Year Published | Quality score     |             |               |                    |                    |              |
|------|----------------------------------|----------------|-------------------|-------------|---------------|--------------------|--------------------|--------------|
|      |                                  |                | Sample population | Sample size | Participation | Outcome assessment | Analytical methods | Total scores |
| V88  | Leal J.Y, et al.[88]             | 2007           | 1                 | 1           | 1             | 2                  | 0                  | 5            |
| V89  | Graebner I.T, et al.[89]         | 2007           | 2                 | 1           | 1             | 2                  | 1                  | 7            |
| V90  | Poveda E, et al.[90]             | 2007           | 2                 | 0           | 1             | 2                  | 2                  | 7            |
| V91  | de Souza V.D.S.L, et al.[91]     | 2007           | 2                 | 1           | 0             | 2                  | 2                  | 7            |
| V92  | Zhang Y, et al.[92]              | 2007           | 2                 | 1           | 2             | 2                  | 2                  | 9            |
| V93  | Faruque A.S, et al.[93]          | 2006           | 2                 | 1           | 1             | 2                  | 1                  | 7            |
| V94  | Paiva A.A, et al.[94]            | 2006           | 2                 | 1           | 2             | 2                  | 1                  | 8            |
| V95  | Li J.H, et al.[95]               | 2006           | 1                 | 0           | 2             | 2                  | 2                  | 7            |
| V96  | Ahmed F, et al.[96]              | 2006           | 2                 | 1           | 2             | 2                  | 2                  | 9            |
| V97  | Ferraz I.S, et al.[97]           | 2005           | 1                 | 1           | 0             | 2                  | 1                  | 5            |
| V98  | Monge-Rojas R, et al.[98]        | 2005           | 2                 | 1           | 0             | 2                  | 1                  | 6            |
| V99  | Sibeko L.N, et al.[99]           | 2004           | 2                 | 1           | 1             | 2                  | 1                  | 7            |
| V100 | Martins M.C, et al.[100]         | 2004           | 2                 | 1           | 2             | 2                  | 2                  | 9            |
| V101 | Castejon H.V, et al.[101]        | 2004           | 2                 | 2           | 0             | 2                  | 1                  | 7            |
| V102 | Mi J, et al.[102]                | 2003           | 2                 | 1           | 1             | 2                  | 1                  | 7            |
| V103 | Lin L, et al.[103]               | 2002           | 2                 | 1           | 2             | 2                  | 1                  | 8            |
| V104 | Amaya-Castellanos D, et al.[104] | 2002           | 2                 | 1           | 0             | 2                  | 1                  | 6            |
| V105 | Oelofse A, et al.[105]           | 2002           | 2                 | 1           | 0             | 2                  | 1                  | 6            |
| V106 | Jinabhai C.C, et al.[106]        | 2001           | 2                 | 1           | 0             | 2                  | 1                  | 6            |
| V107 | Dijkhuizen M.A, et al.[107]      | 2001           | 2                 | 1           | 0             | 1                  | 2                  | 6            |
| V108 | Albalak R, et al.[108]           | 2000           | 2                 | 1           | 0             | 2                  | 1                  | 6            |
| V109 | Gowele VF, et al.[109]           | 2021           | 2                 | 1           | 0             | 2                  | 2                  | 7            |
| V110 | Reddy GB, et al.[110]            | 2022           | 2                 | 1           | 0             | 2                  | 2                  | 7            |
| V111 | De Castro IRR, et al.[111]       | 2021           | 2                 | 1           | 0             | 2                  | 2                  | 7            |
| V112 | Reddy GB, et al.[112]            | 2021           | 2                 | 1           | 0             | 2                  | 2                  | 7            |
| V113 | Tian T, et al.[113]              | 2022           | 2                 | 1           | 0             | 2                  | 2                  | 7            |
| V114 | Janmohamed A, et al.[114]        | 2020           | 2                 | 1           | 0             | 2                  | 2                  | 7            |
| V115 | Shan X, et al.[115]              | 2021           | 2                 | 1           | 0             | 2                  | 2                  | 7            |

| ID   | Author                  | Year Published | Quality score     |             |               |                    |                    |              |
|------|-------------------------|----------------|-------------------|-------------|---------------|--------------------|--------------------|--------------|
|      |                         |                | Sample population | Sample size | Participation | Outcome assessment | Analytical methods | Total scores |
| V116 | Ernawati F, at al.[116] | 2021           | 2                 | 1           | 0             | 2                  | 2                  | 7            |

**Table S7. National prevalence of VAD and public health significance in 2019, by age group**

| Development region | WHO region            | Country     | 0-5 years           |              | 6-12 years          |              | 13-18 years         |              | 0-18 years          |              |
|--------------------|-----------------------|-------------|---------------------|--------------|---------------------|--------------|---------------------|--------------|---------------------|--------------|
|                    |                       |             | Prevalence (%)      | Significance | Prevalence (%)      | Significance | Prevalence (%)      | Significance | Prevalence (%)      | Significance |
| Low SDI            | Africa                | Burundi     | 49.23 (37.05-62.01) | Severe       | 39.54 (28.60-51.98) | Severe       | 30.57 (21.26-42.03) | Severe       | 41.12 (30.10-53.45) | Severe       |
| Low-middle SDI     | Africa                | Comoros     | 27.69 (22.62-33.45) | Severe       | 20.80 (16.70-25.61) | Moderate     | 15.19 (11.94-19.15) | Moderate     | 21.77 (17.55-26.69) | Moderate     |
| Low-middle SDI     | Eastern Mediterranean | Djibouti    | 23.59 (19.28-28.49) | Moderate     | 17.73 (14.26-21.82) | Moderate     | 12.88 (10.14-16.23) | Moderate     | 18.23 (14.70-22.37) | Moderate     |
| Low SDI            | Africa                | Eritrea     | 32.78 (26.17-40.19) | Severe       | 24.98 (19.49-31.45) | Moderate     | 18.75 (14.27-24.25) | Moderate     | 25.92 (20.33-32.44) | Severe       |
| Low SDI            | Africa                | Ethiopia    | 40.83 (31.68-50.86) | Severe       | 31.89 (24.01-41.10) | Severe       | 24.10 (17.59-32.17) | Moderate     | 32.86 (24.91-42.04) | Severe       |
| Low-middle SDI     | Africa                | Kenya       | 22.84 (18.66-27.68) | Moderate     | 16.86 (13.58-20.77) | Moderate     | 12.20 (9.64-15.34)  | Mild         | 17.50 (14.13-21.50) | Moderate     |
| Low SDI            | Africa                | Madagascar  | 33.06 (26.40-40.53) | Severe       | 25.28 (19.72-31.80) | Moderate     | 18.78 (14.29-24.31) | Moderate     | 26.28 (20.62-32.87) | Severe       |
| Low SDI            | Africa                | Malawi      | 36.36 (28.85-44.75) | Severe       | 27.94 (21.63-35.35) | Severe       | 20.90 (15.77-27.23) | Moderate     | 28.97 (22.56-36.43) | Severe       |
| High-middle SDI    | Africa                | Mauritius   | 9.80 (6.49-14.55)   | Mild         | 6.90 (4.52-10.41)   | Mild         | 4.85 (3.13-7.43)    | Mild         | 6.89 (4.51-10.37)   | Mild         |
| Low SDI            | Africa                | Mayotte     | 31.38 (25.16-38.37) | Severe       | 23.90 (18.75-29.96) | Moderate     | 17.80 (13.63-22.92) | Moderate     | 24.67 (19.44-30.77) | Moderate     |
| Low SDI            | Africa                | Mozambique  | 43.44 (33.07-54.54) | Severe       | 34.45 (25.29-45.00) | Severe       | 26.42 (18.72-35.95) | Moderate     | 35.62 (26.41-46.11) | Severe       |
| Low SDI            | Africa                | Réunion     | 26.45 (21.21-32.35) | Severe       | 20.18 (15.83-25.30) | Moderate     | 14.96 (11.45-19.27) | Moderate     | 20.39 (16.04-25.49) | Moderate     |
| Low SDI            | Africa                | Rwanda      | 31.38 (25.43-38.10) | Severe       | 23.68 (18.83-29.40) | Moderate     | 17.46 (13.56-22.22) | Moderate     | 24.76 (19.77-30.58) | Moderate     |
| High-middle SDI    | Africa                | Seychelles  | 8.59 (5.52-13.13)   | Mild         | 6.09 (3.87-9.46)    | Mild         | 4.26 (2.67-6.72)    | Mild         | 6.43 (4.10-9.95)    | Mild         |
| Low SDI            | Eastern Mediterranean | Somalia     | 68.47 (49.41-82.82) | Severe       | 59.92 (40.17-76.86) | Severe       | 50.72 (31.51-69.69) | Severe       | 60.76 (41.41-77.25) | Severe       |
| Low SDI            | Africa                | South Sudan | 38.58 (30.27-47.79) | Severe       | 29.91 (22.84-38.21) | Severe       | 22.48 (16.68-29.65) | Moderate     | 31.07 (23.89-39.4)  | Severe       |
| Low SDI            | Africa                | Uganda      | 33.41 (26.78-40.86) | Severe       | 25.53 (20.02-32)    | Severe       | 18.93 (14.49-24.39) | Moderate     | 26.73 (21.08-33.30) | Severe       |



| Development region | WHO region | Country                          | 0-5 years           |              | 6-12 years          |              | 13-18 years         |              | 0-18 years          |              |
|--------------------|------------|----------------------------------|---------------------|--------------|---------------------|--------------|---------------------|--------------|---------------------|--------------|
|                    |            |                                  | Prevalence (%)      | Significance | Prevalence (%)      | Significance | Prevalence (%)      | Significance | Prevalence (%)      | Significance |
| Low SDI            | Africa     | United Republic of Tanzania      | 30.50 (24.66-37.09) | Severe       | 23.12 (18.32-28.76) | Moderate     | 17.06 (13.22-21.77) | Moderate     | 24.29 (19.35-30.04) | Moderate     |
| Low-middle SDI     | Africa     | Zambia                           | 22.09 (18.06-26.75) | Moderate     | 16.34 (13.17-20.11) | Moderate     | 11.80 (9.33-14.83)  | Mild         | 17.19 (13.89-21.08) | Moderate     |
| Low-middle SDI     | Africa     | Zimbabwe                         | 25.33 (20.75-30.57) | Severe       | 19.03 (15.36-23.37) | Moderate     | 13.82 (10.92-17.35) | Moderate     | 19.82 (16.04-24.25) | Moderate     |
| Low-middle SDI     | Africa     | Angola                           | 23.57 (19.31-28.44) | Moderate     | 17.63 (14.21-21.66) | Moderate     | 12.84 (10.14-16.13) | Moderate     | 18.72 (15.15-22.88) | Moderate     |
| Low-middle SDI     | Africa     | Cameroon                         | 22.52 (18.45-27.19) | Moderate     | 16.72 (13.5-20.53)  | Moderate     | 12.12 (9.59-15.20)  | Mild         | 17.62 (14.27-21.55) | Moderate     |
| Low SDI            | Africa     | Central African Republic         | 46.72 (34.99-58.90) | Severe       | 37.55 (26.97-49.51) | Severe       | 29.23 (20.16-40.35) | Severe       | 38.30 (27.77-50.11) | Severe       |
| Low SDI            | Africa     | Chad                             | 53.88 (39.79-67.91) | Severe       | 44.05 (31.00-58.36) | Severe       | 34.74 (23.32-48.50) | Severe       | 45.42 (32.39-59.48) | Severe       |
| Low-middle SDI     | Africa     | Congo                            | 16.13 (12.74-20.21) | Moderate     | 11.76 (9.17-14.96)  | Mild         | 8.39 (6.43-10.88)   | Mild         | 12.46 (9.74-15.79)  | Mild         |
| Low SDI            | Africa     | Democratic Republic of the Congo | 33.91 (26.88-41.75) | Severe       | 26.13 (20.21-33.08) | Severe       | 19.5 (14.69-25.43)  | Moderate     | 27.51 (21.44-34.56) | Severe       |
| Middle SDI         | Africa     | Equatorial Guinea                | 9.76 (6.67-14.06)   | Mild         | 6.96 (4.70-10.18)   | Mild         | 4.86 (3.24-7.23)    | Mild         | 7.53 (5.10-10.96)   | Mild         |
| Middle SDI         | Africa     | Gabon                            | 10.47 (7.46-14.47)  | Mild         | 7.51 (5.29-10.54)   | Mild         | 5.26 (3.65-7.52)    | Mild         | 8.11 (5.73-11.33)   | Mild         |
| Low-middle SDI     | Africa     | Sao Tome and Principe            | 20.43 (16.71-24.71) | Moderate     | 15.10 (12.17-18.57) | Moderate     | 10.95 (8.66-13.75)  | Mild         | 15.76 (12.74-19.33) | Moderate     |
| Middle SDI         | Africa     | Botswana                         | 12.17 (8.93-16.35)  | Mild         | 8.75 (6.35-11.94)   | Mild         | 6.17 (4.41-8.57)    | Mild         | 9.18 (6.68-12.48)   | Mild         |
| Low-middle SDI     | Africa     | Eswatini                         | 17.65 (13.82-22.29) | Moderate     | 12.75 (9.86-16.35)  | Mild         | 9.13 (6.94-11.93)   | Mild         | 13.24 (10.26-16.94) | Moderate     |
| Low-middle SDI     | Africa     | Lesotho                          | 22.95 (18.75-27.80) | Moderate     | 16.90 (13.61-20.81) | Moderate     | 12.17 (9.61-15.30)  | Mild         | 17.57 (14.19-21.57) | Moderate     |
| Middle SDI         | Africa     | Namibia                          | 14.13 (10.66-18.49) | Moderate     | 10.21 (7.61-13.57)  | Mild         | 7.21 (5.29-9.76)    | Mild         | 10.81 (8.08-14.31)  | Mild         |

| Development region | WHO region | Country       | 0-5 years           |              | 6-12 years          |              | 13-18 years         |              | 0-18 years          |              |
|--------------------|------------|---------------|---------------------|--------------|---------------------|--------------|---------------------|--------------|---------------------|--------------|
|                    |            |               | Prevalence (%)      | Significance | Prevalence (%)      | Significance | Prevalence (%)      | Significance | Prevalence (%)      | Significance |
| Middle SDI         | Africa     | South Africa  | 10.19 (7.03-14.53)  | Mild         | 7.27 (4.96-10.53)   | Mild         | 5.10 (3.43-7.52)    | Mild         | 7.63 (5.22-11.01)   | Mild         |
| Low SDI            | Africa     | Benin         | 36.91 (28.78-45.86) | Severe       | 28.74 (21.78-36.89) | Severe       | 21.67 (15.93-28.77) | Moderate     | 29.91 (22.84-38.08) | Severe       |
| Low SDI            | Africa     | Burkina Faso  | 50.44 (37.51-63.61) | Severe       | 40.89 (29.08-54.06) | Severe       | 32.01 (21.79-44.45) | Severe       | 42.13 (30.32-55.11) | Severe       |
| Low-middle SDI     | Africa     | Cabo Verde    | 19.12 (15.53-23.31) | Moderate     | 14.07 (11.27-17.43) | Moderate     | 10.11 (7.95-12.79)  | Mild         | 14.50 (11.64-17.92) | Moderate     |
| Low SDI            | Africa     | Côte d'Ivoire | 30.61 (24.58-37.38) | Severe       | 23.32 (18.33-29.19) | Moderate     | 17.25 (13.23-22.17) | Moderate     | 24.36 (19.25-30.30) | Moderate     |
| Low SDI            | Africa     | Gambia        | 30.53 (24.42-37.39) | Severe       | 23.37 (18.28-29.36) | Moderate     | 17.33 (13.21-22.38) | Moderate     | 24.59 (19.35-30.67) | Moderate     |
| Low-middle SDI     | Africa     | Ghana         | 17.40 (13.86-21.62) | Moderate     | 12.71 (9.99-16.03)  | Mild         | 9.06 (7.00-11.66)   | Mild         | 13.37 (10.55-16.81) | Moderate     |
| Low SDI            | Africa     | Guinea        | 41.31 (31.74-51.68) | Severe       | 32.49 (24.15-42.18) | Severe       | 24.74 (17.79-33.36) | Moderate     | 33.57 (25.17-43.22) | Severe       |
| Low SDI            | Africa     | Guinea-Bissau | 36.99 (28.89-45.93) | Severe       | 28.80 (21.87-36.92) | Severe       | 21.69 (15.99-28.75) | Moderate     | 29.97 (22.92-38.11) | Severe       |
| Low SDI            | Africa     | Liberia       | 34.52 (27.19-42.68) | Severe       | 26.68 (20.46-33.97) | Severe       | 20.01 (14.93-26.29) | Moderate     | 27.63 (21.33-34.95) | Severe       |
| Low SDI            | Africa     | Mali          | 47.88 (35.7-60.38)  | Severe       | 38.71 (27.64-51.14) | Severe       | 30.25 (20.69-41.92) | Severe       | 40.06 (28.95-52.32) | Severe       |
| Low-middle SDI     | Africa     | Mauritania    | 22.17 (18.15-26.79) | Moderate     | 16.45 (13.27-20.21) | Moderate     | 11.88 (9.40-14.91)  | Mild         | 17.37 (14.06-21.25) | Moderate     |
| Low SDI            | Africa     | Niger         | 64.66 (46.82-80.43) | Severe       | 54.73 (37.29-72.07) | Severe       | 44.64 (28.59-62.62) | Severe       | 56.31 (39.04-73.18) | Severe       |
| Low-middle SDI     | Africa     | Nigeria       | 20.85 (17.00-25.32) | Moderate     | 15.39 (12.37-18.98) | Moderate     | 11.08 (8.74-13.95)  | Mild         | 16.34 (13.19-20.08) | Moderate     |
| Low SDI            | Africa     | Senegal       | 32.85 (26.13-40.37) | Severe       | 25.27 (19.64-31.90) | Moderate     | 18.82 (14.25-24.45) | Moderate     | 26.40 (20.64-33.09) | Severe       |
| Low SDI            | Africa     | Sierra Leone  | 38.04 (29.58-47.34) | Severe       | 29.65 (22.38-38.15) | Severe       | 22.43 (16.43-29.86) | Moderate     | 30.61 (23.27-39.10) | Severe       |
| Low SDI            | Africa     | Togo          | 30.44 (24.54-37.08) | Severe       | 23.12 (18.26-28.83) | Moderate     | 17.10 (13.19-21.88) | Moderate     | 24.10 (19.13-29.89) | Moderate     |
| Middle SDI         | Africa     | Algeria       | 11.20 (8.03-15.41)  | Mild         | 8.05 (5.7-11.24)    | Mild         | 5.66 (3.95-8.04)    | Mild         | 8.71 (6.19-12.11)   | Mild         |

| Development region | WHO region            | Country              | 0-5 years           |              | 6-12 years          |              | 13-18 years        |              | 0-18 years          |              |
|--------------------|-----------------------|----------------------|---------------------|--------------|---------------------|--------------|--------------------|--------------|---------------------|--------------|
|                    |                       |                      | Prevalence (%)      | Significance | Prevalence (%)      | Significance | Prevalence (%)     | Significance | Prevalence (%)      | Significance |
| Middle SDI         | Eastern Mediterranean | Egypt                | 11.92 (8.47-16.54)  | Mild         | 8.62 (6.05-12.13)   | Mild         | 6.01 (4.16-8.61)   | Mild         | 9.19 (6.48-12.88)   | Mild         |
| High-middle SDI    | Eastern Mediterranean | Libya                | 8.52 (5.61-12.72)   | Mild         | 6.07 (3.95-9.21)    | Mild         | 4.25 (2.73-6.55)   | Mild         | 6.34 (4.14-9.58)    | Mild         |
| Low-middle SDI     | Eastern Mediterranean | Morocco              | 17.63 (14.13-21.77) | Moderate     | 12.94 (10.25-16.23) | Moderate     | 9.24 (7.18-11.81)  | Mild         | 13.42 (10.64-16.78) | Moderate     |
| Low-middle SDI     | Eastern Mediterranean | Sudan                | 21.86 (17.82-26.54) | Moderate     | 16.09 (12.94-19.86) | Moderate     | 11.60 (9.15-14.61) | Mild         | 16.88 (13.61-20.76) | Moderate     |
| Middle SDI         | Eastern Mediterranean | Tunisia              | 10.37 (7.22-14.66)  | Mild         | 7.46 (5.13-10.71)   | Mild         | 5.20 (3.53-7.6)    | Mild         | 7.87 (5.43-11.26)   | Mild         |
| Middle SDI         | Africa                | Western Sahara       | 10.34 (7.33-14.38)  | Mild         | 7.43 (5.20-10.49)   | Mild         | 5.20 (3.59-7.47)   | Mild         | 7.77 (5.46-10.94)   | Mild         |
| Middle SDI         | Europe                | Armenia              | 9.82 (6.67-14.23)   | Mild         | 7.01 (4.71-10.33)   | Mild         | 4.92 (3.26-7.36)   | Mild         | 7.37 (4.96-10.81)   | Mild         |
| Middle SDI         | Europe                | Azerbaijan           | 10.27 (7.03-14.75)  | Mild         | 7.40 (5.01-10.8)    | Mild         | 5.14 (3.43-7.63)   | Mild         | 7.82 (5.31-11.37)   | Mild         |
| High-middle SDI    | Eastern Mediterranean | Bahrain              | 6.87 (4.22-10.96)   | Mild         | 4.90 (2.98-7.93)    | Mild         | 3.39 (2.04-5.59)   | Mild         | 5.16 (3.15-8.32)    | Mild         |
| High-middle SDI    | Europe                | Georgia              | 9.37 (6.24-13.85)   | Mild         | 6.71 (4.41-10.06)   | Mild         | 4.68 (3.04-7.15)   | Mild         | 7.06 (4.66-10.56)   | Mild         |
| Middle SDI         | Eastern Mediterranean | Iraq                 | 10.39 (7.24-14.67)  | Mild         | 7.45 (5.13-10.68)   | Mild         | 5.21 (3.54-7.61)   | Mild         | 7.87 (5.44-11.24)   | Mild         |
| High-middle SDI    | Europe                | Israel               | 5.40 (3.04-9.40)    | Mild         | 3.80 (2.12-6.72)    | Mild         | 2.63 (1.45-4.72)   | None         | 4.04 (2.26-7.10)    | Mild         |
| High-middle SDI    | Eastern Mediterranean | Jordan               | 7.46 (4.74-11.53)   | Mild         | 5.29 (3.33-8.31)    | Mild         | 3.70 (2.30-5.91)   | Mild         | 5.49 (3.46-8.59)    | Mild         |
| High-middle SDI    | Eastern Mediterranean | Lebanon              | 8.34 (5.50-12.44)   | Mild         | 5.93 (3.87-8.99)    | Mild         | 4.14 (2.66-6.37)   | Mild         | 6.14 (4.01-9.27)    | Mild         |
| High-middle SDI    | Eastern Mediterranean | Oman                 | 6.08 (3.54-10.23)   | Mild         | 4.27 (2.47-7.30)    | Mild         | 2.97 (1.69-5.15)   | None         | 4.74 (2.74-8.04)    | Mild         |
| High-middle SDI    | Eastern Mediterranean | Saudi Arabia         | 5.49 (3.08-9.59)    | Mild         | 3.87 (2.15-6.87)    | Mild         | 2.69 (1.48-4.83)   | None         | 4.12 (2.30-7.27)    | Mild         |
| Low-middle SDI     | Eastern Mediterranean | State of Palestine   | 14.45 (11.2-18.44)  | Moderate     | 10.51 (8.04-13.61)  | Mild         | 7.45 (5.61-9.83)   | Mild         | 11.08 (8.50-14.30)  | Mild         |
| Middle SDI         | Eastern Mediterranean | Syrian Arab Republic | 13.64 (10.21-17.99) | Moderate     | 9.74 (7.20-13.06)   | Mild         | 6.92 (5.03-9.44)   | Mild         | 10.21 (7.56-13.63)  | Mild         |

| Development region | WHO region            | Country                    | 0-5 years           |              | 6-12 years          |              | 13-18 years         |              | 0-18 years          |              |
|--------------------|-----------------------|----------------------------|---------------------|--------------|---------------------|--------------|---------------------|--------------|---------------------|--------------|
|                    |                       |                            | Prevalence (%)      | Significance | Prevalence (%)      | Significance | Prevalence (%)      | Significance | Prevalence (%)      | Significance |
| High-middle SDI    | Europe                | Turkey                     | 7.28 (4.50-11.57)   | Mild         | 5.15 (3.15-8.30)    | Mild         | 3.58 (2.16-5.87)    | Mild         | 5.32 (3.26-8.55)    | Mild         |
| Low SDI            | Eastern Mediterranean | Yemen                      | 31.34 (25.21-38.24) | Severe       | 23.89 (18.82-29.85) | Moderate     | 17.66 (13.58-22.66) | Moderate     | 24.76 (19.60-30.79) | Moderate     |
| High-middle SDI    | Europe                | Kazakhstan                 | 8.61 (5.54-13.14)   | Mild         | 6.15 (3.92-9.54)    | Mild         | 4.30 (2.71-6.78)    | Mild         | 6.66 (4.26-10.27)   | Mild         |
| Low-middle SDI     | Europe                | Kyrgyzstan                 | 15.69 (12.06-20.19) | Moderate     | 11.49 (8.73-15.00)  | Mild         | 8.09 (6.04-10.77)   | Mild         | 12.23 (9.32-15.91)  | Mild         |
| Low-middle SDI     | Europe                | Tajikistan                 | 20.34 (16.4-24.98)  | Moderate     | 14.98 (11.93-18.68) | Moderate     | 10.68 (8.34-13.58)  | Mild         | 16.03 (12.81-19.90) | Moderate     |
| Middle SDI         | Europe                | Turkmenistan               | 10.99 (7.67-15.50)  | Mild         | 7.95 (5.49-11.38)   | Mild         | 5.53 (3.76-8.06)    | Mild         | 8.43 (5.84-12.02)   | Mild         |
| Middle SDI         | Europe                | Uzbekistan                 | 13.12 (9.67-17.56)  | Mild         | 9.44 (6.88-12.83)   | Mild         | 6.65 (4.77-9.20)    | Mild         | 10.00 (7.31-13.54)  | Mild         |
| Low SDI            | Eastern Mediterranean | Afghanistan                | 40.32 (31.28-50.24) | Severe       | 31.47 (23.69-40.56) | Severe       | 23.86 (17.42-31.84) | Moderate     | 32.31 (24.48-41.36) | Severe       |
| Low-middle SDI     | South-East Asia       | Bangladesh                 | 24.37 (19.97-29.41) | Moderate     | 18.08 (14.59-22.20) | Moderate     | 13.13 (10.38-16.48) | Moderate     | 18.37 (14.84-22.52) | Moderate     |
| Low-middle SDI     | South-East Asia       | Bhutan                     | 26.72 (21.83-32.28) | Severe       | 19.92 (15.99-24.54) | Moderate     | 14.57 (11.45-18.38) | Moderate     | 20.20 (16.25-24.83) | Moderate     |
| Low-middle SDI     | South-East Asia       | India                      | 17.90 (14.15-22.39) | Moderate     | 12.95 (10.11-16.46) | Moderate     | 9.27 (7.11-12.00)   | Mild         | 13.24 (10.35-16.79) | Moderate     |
| Middle SDI         | Eastern Mediterranean | Iran (Islamic Republic of) | 10.32 (7.21-14.55)  | Mild         | 7.35 (5.08-10.53)   | Mild         | 5.16 (3.51-7.51)    | Mild         | 7.83 (5.42-11.17)   | Mild         |
| Low-middle SDI     | South-East Asia       | Maldives                   | 17.82 (14.14-22.23) | Moderate     | 13.06 (10.24-16.54) | Moderate     | 9.26 (7.13-11.96)   | Mild         | 13.75 (10.80-17.35) | Moderate     |
| Low SDI            | South-East Asia       | Nepal                      | 31.75 (25.65-38.63) | Severe       | 23.99 (19.00-29.87) | Moderate     | 17.70 (13.69-22.61) | Moderate     | 24.11 (19.13-29.96) | Moderate     |
| Low SDI            | Eastern Mediterranean | Pakistan                   | 27.70 (22.60-33.5)  | Severe       | 20.80 (16.67-25.66) | Moderate     | 15.21 (11.93-19.21) | Moderate     | 21.64 (17.41-26.58) | Moderate     |
| High-middle SDI    | South-East Asia       | Sri Lanka                  | 11.13 (7.54-16.15)  | Mild         | 7.89 (5.29-11.63)   | Mild         | 5.55 (3.67-8.32)    | Mild         | 8.17 (5.49-12.01)   | Mild         |
| Middle SDI         | Western Pacific       | China                      | 10.01 (6.83-14.45)  | Mild         | 7.13 (4.81-10.46)   | Mild         | 5.00 (3.32-7.45)    | Mild         | 7.39 (5.00-10.8)    | Mild         |
| Middle SDI         | Western Pacific       | China, Hong Kong SAR       | 8.94 (6.10-12.89)   | Mild         | 6.31 (4.25-9.24)    | Mild         | 4.40 (2.93-6.57)    | Mild         | 6.71 (4.54-9.80)    | Mild         |

| Development region | WHO region      | Country                          | 0-5 years           |              | 6-12 years          |              | 13-18 years         |              | 0-18 years          |              |
|--------------------|-----------------|----------------------------------|---------------------|--------------|---------------------|--------------|---------------------|--------------|---------------------|--------------|
|                    |                 |                                  | Prevalence (%)      | Significance | Prevalence (%)      | Significance | Prevalence (%)      | Significance | Prevalence (%)      | Significance |
| Middle SDI         | Western Pacific | China, Macao SAR                 | 8.86 (6.04-12.79)   | Mild         | 6.38 (4.31-9.35)    | Mild         | 4.39 (2.92-6.55)    | Mild         | 6.88 (4.65-10.03)   | Mild         |
| Low-middle SDI     | South-East Asia | Dem. People's Republic of Korea  | 17.07 (13.59-21.22) | Moderate     | 12.40 (9.75-15.66)  | Mild         | 8.84 (6.82-11.38)   | Mild         | 12.67 (9.97-15.97)  | Mild         |
| Low-middle SDI     | Western Pacific | Mongolia                         | 13.75 (10.45-17.88) | Moderate     | 10.03 (7.53-13.23)  | Mild         | 7.06 (5.22-9.50)    | Mild         | 10.79 (8.13-14.18)  | Mild         |
| Low-middle SDI     | Western Pacific | Cambodia                         | 26.66 (21.83-32.17) | Severe       | 19.93 (16.06-24.50) | Moderate     | 14.51 (11.45-18.23) | Moderate     | 20.68 (16.72-25.33) | Moderate     |
| Middle SDI         | South-East Asia | Indonesia                        | 11.35 (8.04-15.79)  | Mild         | 8.14 (5.70-11.49)   | Mild         | 5.71 (3.94-8.20)    | Mild         | 8.41 (5.90-11.85)   | Mild         |
| Low-middle SDI     | Western Pacific | Lao People's Democratic Republic | 23.92 (19.59-28.88) | Moderate     | 17.71 (14.29-21.75) | Moderate     | 12.84 (10.16-16.12) | Moderate     | 18.30 (14.81-22.42) | Moderate     |
| High-middle SDI    | Western Pacific | Malaysia                         | 7.65 (4.81-11.94)   | Mild         | 5.39 (3.36-8.55)    | Mild         | 3.75 (2.30-6.04)    | Mild         | 5.58 (3.48-8.82)    | Mild         |
| Low-middle SDI     | South-East Asia | Myanmar                          | 21.58 (17.55-26.26) | Moderate     | 15.78 (12.66-19.52) | Moderate     | 11.39 (8.96-14.38)  | Mild         | 16.04 (12.88-19.80) | Moderate     |
| Middle SDI         | Western Pacific | Philippines                      | 13.61 (10.13-18.05) | Moderate     | 9.83 (7.23-13.24)   | Mild         | 6.94 (5.03-9.52)    | Mild         | 10.15 (7.48-13.63)  | Mild         |
| Middle SDI         | South-East Asia | Thailand                         | 10.27 (6.99-14.84)  | Mild         | 7.28 (4.90-10.69)   | Mild         | 5.11 (3.39-7.63)    | Mild         | 7.40 (4.99-10.84)   | Mild         |
| Low-middle SDI     | South-East Asia | Timor-Leste                      | 22.26 (18.15-27.02) | Moderate     | 16.28 (13.09-20.08) | Moderate     | 11.75 (9.27-14.8)   | Mild         | 16.92 (13.64-20.82) | Moderate     |
| Middle SDI         | Western Pacific | Viet Nam                         | 14.44 (10.83-19.01) | Moderate     | 10.39 (7.70-13.89)  | Mild         | 7.35 (5.36-10.00)   | Mild         | 10.91 (8.10-14.53)  | Mild         |
| High-middle SDI    | Americas        | Antigua and Barbuda              | 8.68 (5.40-13.67)   | Mild         | 6.13 (3.78-9.81)    | Mild         | 4.26 (2.59-6.92)    | Mild         | 6.38 (3.94-10.17)   | Mild         |
| Middle SDI         | Americas        | Aruba                            | 13.45 (9.91-18)     | Mild         | 9.50 (6.92-12.92)   | Mild         | 6.75 (4.84-9.35)    | Mild         | 9.66 (7.05-13.12)   | Mild         |
| High-middle SDI    | Americas        | Bahamas                          | 5.78 (3.29-9.93)    | Mild         | 4.00 (2.26-6.99)    | Mild         | 2.80 (1.56-4.96)    | None         | 4.09 (2.31-7.12)    | Mild         |
| High-middle SDI    | Americas        | Barbados                         | 8.57 (5.35-13.47)   | Mild         | 6.00 (3.70-9.59)    | Mild         | 4.20 (2.56-6.82)    | Mild         | 6.09 (3.76-9.71)    | Mild         |
| Middle SDI         | Americas        | Cuba                             | 10.27 (7.19-14.44)  | Mild         | 7.37 (5.10-10.52)   | Mild         | 5.15 (3.52-7.49)    | Mild         | 7.53 (5.22-10.73)   | Mild         |

| Development region | WHO region | Country                          | 0-5 years           |              | 6-12 years          |              | 13-18 years         |              | 0-18 years          |              |
|--------------------|------------|----------------------------------|---------------------|--------------|---------------------|--------------|---------------------|--------------|---------------------|--------------|
|                    |            |                                  | Prevalence (%)      | Significance | Prevalence (%)      | Significance | Prevalence (%)      | Significance | Prevalence (%)      | Significance |
| Middle SDI         | Americas   | Curaçao                          | 11.55 (8.51-15.47)  | Mild         | 8.33 (6.07-11.33)   | Mild         | 5.89 (4.22-8.15)    | Mild         | 8.44 (6.15-11.45)   | Mild         |
| Low-middle SDI     | Americas   | Dominican Republic               | 13.96 (10.78-17.89) | Moderate     | 10.09 (7.69-13.13)  | Mild         | 7.16 (5.37-9.50)    | Mild         | 10.44 (7.97-13.54)  | Mild         |
| Middle SDI         | Americas   | Grenada                          | 11.59 (8.11-16.32)  | Mild         | 8.28 (5.73-11.85)   | Mild         | 5.81 (3.96-8.46)    | Mild         | 8.70 (6.03-12.39)   | Mild         |
| Middle SDI         | Americas   | Guadeloupe                       | 11.35 (8.37-15.20)  | Mild         | 7.99 (5.81-10.87)   | Mild         | 5.70 (4.09-7.89)    | Mild         | 8.06 (5.88-10.95)   | Mild         |
| Low SDI            | Americas   | Haiti                            | 27.70 (22.47-33.61) | Severe       | 20.92 (16.65-25.94) | Moderate     | 15.39 (11.98-19.56) | Moderate     | 21.48 (17.15-26.54) | Moderate     |
| Middle SDI         | Americas   | Jamaica                          | 10.26 (7.02-14.76)  | Mild         | 7.31 (4.94-10.68)   | Mild         | 5.10 (3.40-7.59)    | Mild         | 7.53 (5.10-10.97)   | Mild         |
| Middle SDI         | Americas   | Martinique                       | 11.71 (8.64-15.68)  | Mild         | 8.24 (6.00-11.21)   | Mild         | 5.88 (4.21-8.13)    | Mild         | 8.30 (6.05-11.28)   | Mild         |
| Middle SDI         | Americas   | Saint Lucia                      | 12.11 (8.46-17.08)  | Mild         | 8.63 (5.95-12.36)   | Mild         | 6.03 (4.10-8.78)    | Mild         | 8.75 (6.05-12.51)   | Mild         |
| Middle SDI         | Americas   | Saint Vincent and the Grenadines | 13.18 (9.76-17.56)  | Mild         | 9.48 (6.94-12.83)   | Mild         | 6.68 (4.82-9.21)    | Mild         | 9.63 (7.06-13.01)   | Mild         |
| High-middle SDI    | Americas   | Trinidad and Tobago              | 7.49 (4.56-12.07)   | Mild         | 5.29 (3.19-8.66)    | Mild         | 3.69 (2.20-6.14)    | Mild         | 5.48 (3.31-8.94)    | Mild         |
| High-middle SDI    | Americas   | United States Virgin Islands     | 5.41 (3.06-9.35)    | Mild         | 3.81 (2.14-6.68)    | Mild         | 2.65 (1.47-4.73)    | None         | 3.90 (2.19-6.83)    | Mild         |
| Low-middle SDI     | Americas   | Belize                           | 14.92 (11.37-19.33) | Moderate     | 10.75 (8.10-14.15)  | Mild         | 7.61 (5.64-10.20)   | Mild         | 11.07 (8.35-14.53)  | Mild         |
| Middle SDI         | Americas   | Costa Rica                       | 9.68 (6.66-13.85)   | Mild         | 6.89 (4.69-10.02)   | Mild         | 4.83 (3.24-7.14)    | Mild         | 7.10 (4.84-10.29)   | Mild         |
| Low-middle SDI     | Americas   | El Salvador                      | 15.53 (12.21-19.54) | Moderate     | 11.25 (8.73-14.37)  | Mild         | 8.01 (6.11-10.43)   | Mild         | 11.55 (8.98-14.72)  | Mild         |
| Low-middle SDI     | Americas   | Guatemala                        | 19.96 (16.20-24.35) | Moderate     | 14.64 (11.72-18.14) | Moderate     | 10.52 (8.26-13.30)  | Mild         | 15.10 (12.11-18.66) | Moderate     |
| Low-middle SDI     | Americas   | Honduras                         | 21.95 (17.97-26.53) | Moderate     | 16.18 (13.06-19.89) | Moderate     | 11.73 (9.27-14.72)  | Mild         | 16.54 (13.37-20.29) | Moderate     |
| Middle SDI         | Americas   | Mexico                           | 11.06 (7.96-15.16)  | Mild         | 7.91 (5.63-11.01)   | Mild         | 5.57 (3.90-7.89)    | Mild         | 8.16 (5.81-11.32)   | Mild         |

| Development region | WHO region      | Country                            | 0-5 years           |              | 6-12 years          |              | 13-18 years         |              | 0-18 years          |              |
|--------------------|-----------------|------------------------------------|---------------------|--------------|---------------------|--------------|---------------------|--------------|---------------------|--------------|
|                    |                 |                                    | Prevalence (%)      | Significance | Prevalence (%)      | Significance | Prevalence (%)      | Significance | Prevalence (%)      | Significance |
| Low-middle SDI     | Americas        | Nicaragua                          | 20.19 (16.45-24.54) | Moderate     | 14.88 (11.95-18.37) | Moderate     | 10.72 (8.45-13.51)  | Mild         | 15.36 (12.36-18.92) | Moderate     |
| Middle SDI         | Americas        | Panama                             | 9.82 (6.70-14.17)   | Mild         | 6.99 (4.71-10.24)   | Mild         | 4.89 (3.25-7.30)    | Mild         | 7.29 (4.92-10.64)   | Mild         |
| High-middle SDI    | Americas        | Argentina                          | 8.27 (5.45-12.33)   | Mild         | 5.87 (3.82-8.88)    | Mild         | 4.10 (2.64-6.31)    | Mild         | 6.10 (3.99-9.21)    | Mild         |
| Low-middle SDI     | Americas        | Bolivia (Plurinational State of)   | 16.13 (12.75-20.18) | Moderate     | 11.72 (9.15-14.89)  | Mild         | 8.36 (6.42-10.83)   | Mild         | 12.10 (9.46-15.33)  | Mild         |
| Middle SDI         | Americas        | Brazil                             | 11.27 (8.21-15.26)  | Mild         | 8.06 (5.80-11.08)   | Mild         | 5.67 (4.02-7.94)    | Mild         | 8.23 (5.93-11.30)   | Mild         |
| High-middle SDI    | Americas        | Chile                              | 6.67 (4.04-10.78)   | Mild         | 4.72 (2.83-7.74)    | Mild         | 3.28 (1.94-5.47)    | None         | 4.85 (2.92-7.95)    | Mild         |
| Middle SDI         | Americas        | Colombia                           | 11.83 (8.70-15.88)  | Mild         | 8.45 (6.14-11.52)   | Mild         | 5.96 (4.26-8.28)    | Mild         | 8.62 (6.27-11.73)   | Mild         |
| Middle SDI         | Americas        | Ecuador                            | 12.12 (8.83-16.42)  | Mild         | 8.68 (6.25-11.94)   | Mild         | 6.11 (4.33-8.55)    | Mild         | 9.02 (6.50-12.36)   | Mild         |
| High-middle SDI    | Americas        | French Guiana                      | 8.03 (5.18-12.21)   | Mild         | 5.65 (3.61-8.73)    | Mild         | 3.94 (2.49-6.2)     | Mild         | 5.98 (3.83-9.20)    | Mild         |
| Middle SDI         | Americas        | Guyana                             | 14.78 (11.07-19.47) | Moderate     | 10.65 (7.88-14.25)  | Mild         | 7.50 (5.46-10.22)   | Mild         | 10.96 (8.12-14.63)  | Mild         |
| Middle SDI         | Americas        | Paraguay                           | 12.30 (8.99-16.62)  | Mild         | 8.80 (6.35-12.07)   | Mild         | 6.21 (4.41-8.67)    | Mild         | 9.13 (6.60-12.49)   | Mild         |
| Middle SDI         | Americas        | Peru                               | 11.26 (8.12-15.40)  | Mild         | 7.99 (5.69-11.11)   | Mild         | 5.65 (3.97-8.00)    | Mild         | 8.36 (5.97-11.58)   | Mild         |
| Middle SDI         | Americas        | Suriname                           | 12.24 (8.96-16.49)  | Mild         | 8.78 (6.35-12.01)   | Mild         | 6.19 (4.41-8.62)    | Mild         | 9.08 (6.58-12.39)   | Mild         |
| High-middle SDI    | Americas        | Uruguay                            | 8.58 (5.75-12.58)   | Mild         | 6.09 (4.04-9.07)    | Mild         | 4.25 (2.78-6.45)    | Mild         | 6.28 (4.17-9.33)    | Mild         |
| Low-middle SDI     | Americas        | Venezuela (Bolivarian Republic of) | 12.79 (9.71-16.65)  | Mild         | 9.29 (6.97-12.28)   | Mild         | 6.59 (4.86-8.87)    | Mild         | 9.50 (7.14-12.54)   | Mild         |
| Middle SDI         | Western Pacific | Fiji                               | 11.17 (7.87-15.62)  | Mild         | 7.98 (5.56-11.33)   | Mild         | 5.61 (3.85-8.11)    | Mild         | 8.38 (5.85-11.86)   | Mild         |
| Low SDI            | Western Pacific | New Caledonia                      | 24.63 (20.1-29.78)  | Severe       | 18.52 (14.86-22.83) | Moderate     | 13.54 (10.63-17.09) | Moderate     | 18.78 (15.09-23.10) | Moderate     |

| Development region | WHO region      | Country                     | 0-5 years           |              | 6-12 years          |              | 13-18 years         |              | 0-18 years          |              |
|--------------------|-----------------|-----------------------------|---------------------|--------------|---------------------|--------------|---------------------|--------------|---------------------|--------------|
|                    |                 |                             | Prevalence (%)      | Significance | Prevalence (%)      | Significance | Prevalence (%)      | Significance | Prevalence (%)      | Significance |
| Low SDI            | Western Pacific | Papua New Guinea            | 35.59 (28.38-43.66) | Severe       | 27.23 (21.22-34.29) | Severe       | 20.26 (15.39-26.25) | Moderate     | 28.04 (21.96-35.14) | Severe       |
| Low SDI            | Western Pacific | Solomon Islands             | 33.09 (26.56-40.43) | Severe       | 25.30 (19.88-31.67) | Moderate     | 18.69 (14.33-24.04) | Moderate     | 26.47 (20.92-32.94) | Severe       |
| Low-middle SDI     | Western Pacific | Vanuatu                     | 25.14 (20.60-30.34) | Severe       | 18.63 (15.04-22.88) | Moderate     | 13.58 (10.75-17.04) | Moderate     | 19.59 (15.87-23.97) | Moderate     |
| Low-middle SDI     | Western Pacific | Kiribati                    | 19.68 (15.97-24.02) | Moderate     | 14.44 (11.56-17.90) | Moderate     | 10.41 (8.18-13.17)  | Mild         | 15.28 (12.27-18.88) | Moderate     |
| Low-middle SDI     | Western Pacific | Micronesia (Fed. States of) | 17.50 (13.67-22.16) | Moderate     | 12.64 (9.75-16.26)  | Mild         | 9.00 (6.82-11.8)    | Mild         | 13.09 (10.11-16.79) | Moderate     |
| Low SDI            | Western Pacific | French Polynesia            | 25.55 (20.86-30.88) | Severe       | 18.96 (15.21-23.39) | Moderate     | 13.98 (10.97-17.64) | Moderate     | 19.29 (15.50-23.73) | Moderate     |
| Middle SDI         | Western Pacific | Samoa                       | 13.83 (10.06-18.74) | Moderate     | 9.87 (7.10-13.59)   | Mild         | 6.98 (4.94-9.78)    | Mild         | 10.54 (7.60-14.45)  | Mild         |
| Middle SDI         | Western Pacific | Tonga                       | 13.84 (10.13-18.64) | Moderate     | 9.93 (7.19-13.59)   | Mild         | 7.02 (5.00-9.77)    | Mild         | 10.30 (7.47-14.06)  | Mild         |
| High-middle SDI    | Europe          | Belarus                     | 7.26 (4.51-11.48)   | Mild         | 5.21 (3.20-8.35)    | Mild         | 3.61 (2.19-5.88)    | Mild         | 5.48 (3.38-8.76)    | Mild         |
| High-middle SDI    | Europe          | Bulgaria                    | 6.80 (4.09-11.09)   | Mild         | 4.77 (2.84-7.89)    | Mild         | 3.35 (1.97-5.63)    | None         | 4.94 (2.95-8.16)    | Mild         |
| High-middle SDI    | Europe          | Hungary                     | 6.12 (3.51-10.43)   | Mild         | 4.26 (2.42-7.38)    | Mild         | 2.97 (1.67-5.22)    | None         | 4.41 (2.51-7.60)    | Mild         |
| High-middle SDI    | Europe          | Poland                      | 6.02 (3.39-10.46)   | Mild         | 4.21 (2.35-7.42)    | Mild         | 2.93 (1.62-5.25)    | None         | 4.40 (2.46-7.73)    | Mild         |
| High-middle SDI    | Europe          | Republic of Moldova         | 10.10 (6.78-14.79)  | Mild         | 7.2 (4.78-10.71)    | Mild         | 5.04 (3.30-7.62)    | Mild         | 7.45 (4.95-11.04)   | Mild         |
| High-middle SDI    | Europe          | Romania                     | 7.41 (4.49-12.00)   | Mild         | 5.18 (3.10-8.52)    | Mild         | 3.63 (2.15-6.07)    | Mild         | 5.35 (3.21-8.77)    | Mild         |
| High-middle SDI    | Europe          | Russian Federation          | 5.66 (3.17-9.88)    | Mild         | 4.00 (2.22-7.08)    | Mild         | 2.77 (1.52-4.98)    | None         | 4.25 (2.37-7.51)    | Mild         |
| High-middle SDI    | Europe          | Ukraine                     | 7.80 (4.91-12.15)   | Mild         | 5.55 (3.46-8.79)    | Mild         | 3.89 (2.39-6.25)    | Mild         | 5.78 (3.61-9.12)    | Mild         |
| Middle SDI         | Europe          | Albania                     | 10.21 (7.02-14.63)  | Mild         | 7.28 (4.95-10.59)   | Mild         | 5.07 (3.39-7.50)    | Mild         | 7.39 (5.03-10.73)   | Mild         |



| Development region | WHO region | Country                | 0-5 years         |              | 6-12 years       |              | 13-18 years      |              | 0-18 years       |              |
|--------------------|------------|------------------------|-------------------|--------------|------------------|--------------|------------------|--------------|------------------|--------------|
|                    |            |                        | Prevalence (%)    | Significance | Prevalence (%)   | Significance | Prevalence (%)   | Significance | Prevalence (%)   | Significance |
| High-middle SDI    | Europe     | Bosnia and Herzegovina | 8.99 (5.83-13.61) | Mild         | 6.37 (4.09-9.80) | Mild         | 4.47 (2.83-6.98) | Mild         | 6.47 (4.15-9.93) | Mild         |
| High-middle SDI    | Europe     | Croatia                | 6.26 (3.58-10.73) | Mild         | 4.40 (2.49-7.65) | Mild         | 3.06 (1.71-5.40) | None         | 4.53 (2.57-7.87) | Mild         |
| High-middle SDI    | Europe     | Greece                 | 5.85 (3.34-10.02) | Mild         | 4.09 (2.32-7.12) | Mild         | 2.86 (1.60-5.05) | None         | 4.15 (2.35-7.21) | Mild         |
| High-middle SDI    | Europe     | Italy                  | 5.81 (3.28-10.08) | Mild         | 4.08 (2.28-7.19) | Mild         | 2.84 (1.57-5.08) | None         | 4.16 (2.33-7.30) | Mild         |
| High-middle SDI    | Europe     | Malta                  | 5.41 (3.05-9.38)  | Mild         | 3.80 (2.13-6.69) | Mild         | 2.63 (1.45-4.69) | None         | 3.97 (2.22-6.96) | Mild         |
| High-middle SDI    | Europe     | Montenegro             | 6.19 (3.56-10.55) | Mild         | 4.32 (2.46-7.48) | Mild         | 3.01 (1.69-5.29) | None         | 4.47 (2.54-7.71) | Mild         |
| High-middle SDI    | Europe     | North Macedonia        | 7.83 (4.87-12.35) | Mild         | 5.54 (3.41-8.87) | Mild         | 3.84 (2.34-6.26) | Mild         | 5.69 (3.51-9.10) | Mild         |
| High-middle SDI    | Europe     | Portugal               | 7.67 (4.78-12.09) | Mild         | 5.40 (3.33-8.64) | Mild         | 3.78 (2.30-6.14) | Mild         | 5.46 (3.37-8.71) | Mild         |
| High-middle SDI    | Europe     | Serbia                 | 7.12 (4.26-11.67) | Mild         | 4.98 (2.95-8.29) | Mild         | 3.48 (2.04-5.88) | Mild         | 5.07 (3.01-8.42) | Mild         |
| High-middle SDI    | Europe     | Spain                  | 6.59 (3.94-10.79) | Mild         | 4.62 (2.74-7.69) | Mild         | 3.24 (1.90-5.48) | None         | 4.75 (2.82-7.88) | Mild         |

*Note: SDI=Socio-demographic Index; WHO=the World Health Organization.*

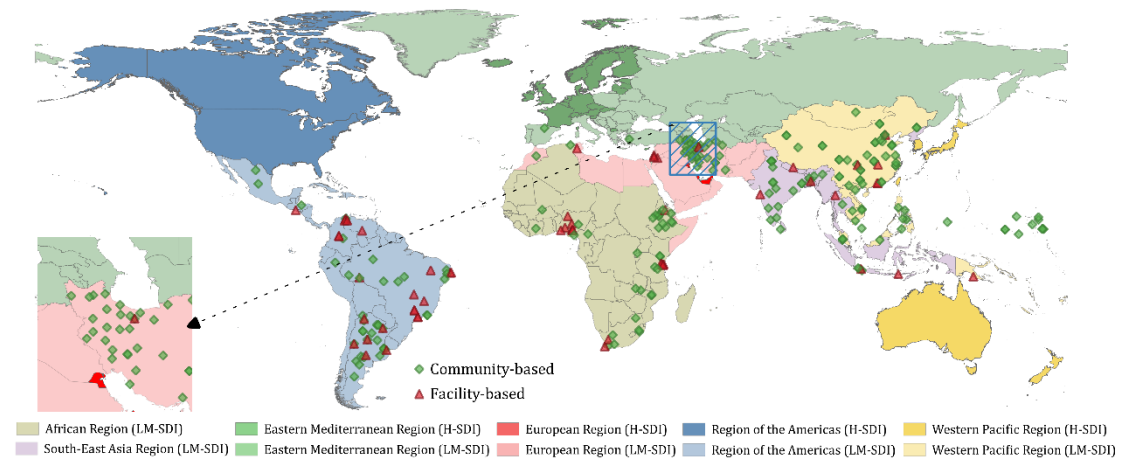

**Figure S1. Contributing data sources across world regions**

*Note: H-SDI= high- socio-demographic index, including countries with  $SDI \geq 0.805$ ; LM-SDI= low- and middle- socio-demographic index, including high-middle SDI, low-middle SDI, low SDI countries with an  $SDI < 0.805$ .*

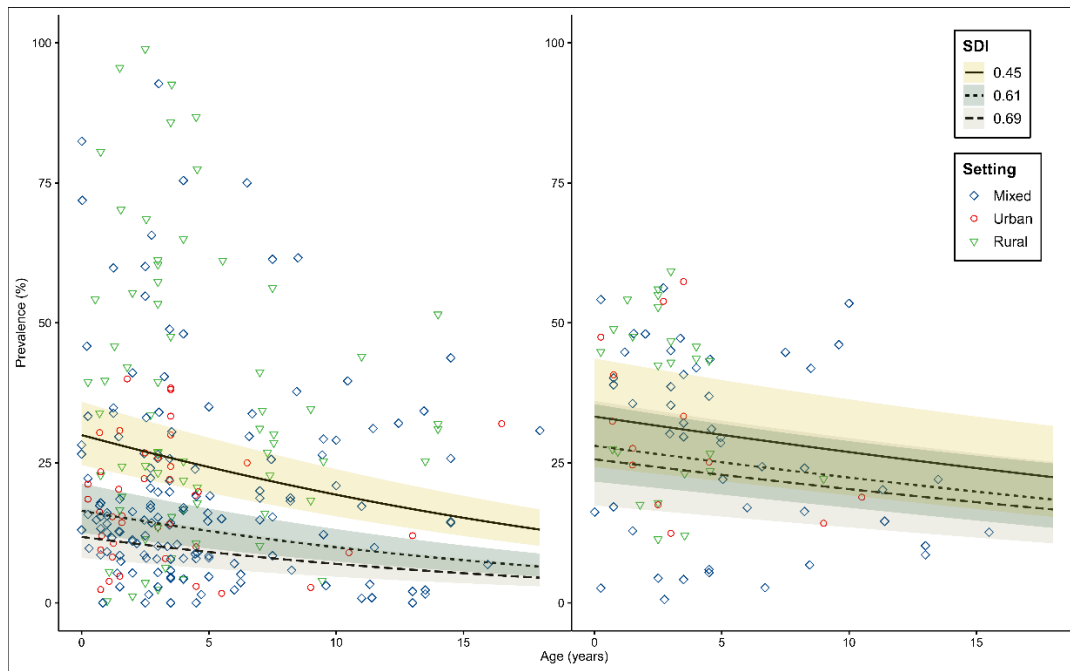

**Figure S2. The relations of age and prevalence of VAD and mVAD, by SDI**

*Note: SDI=Socio-demographic Index; VAD= Vitamin A Deficiency; mVAD= Marginal Vitamin A Deficiency.*

## eMethods. The detailed description of stages in the national estimation of VAD or mVAD prevalence in LMICs

This section is a supplement to the Methods part in the main text.

**Stage 1:** Search strategy and selection criteria: identifying all epidemiological studies that reported prevalence of VAD/mVD in the general paediatric population using multiple data sources

**Stage 2:** Extracting data points of prevalence from the included studies

**Stage 3:** Epidemiological modelling of the prevalence of VAD and mVAD in children

Due to the hierarchical structure of extracted data, we applied a multilevel mixed-effects meta-regression approach to establish the regression models of VAD and mVAD prevalence. The effect of data points clustering from the same study was controlled by adding the study identification and country identification into the regression model as the random effect ( $u_i$ ).<sup>[117]</sup>

Given that:

$$\text{prevalence} = p = \frac{(\text{number of cases})}{(\text{number of participants})}$$

Then, the prevalence was stabilized with the logit link,

$$\text{logit}(p) = \ln\left(\frac{p}{1-p}\right) = \ln(\text{odds}) = \alpha + \beta_1 * x_1 + \beta_2 * x_2 + \dots \beta_n * x_n + u_i$$

Thus,

$$\text{odds} = \frac{p}{1-p} = e^{(\alpha + \beta_1 * x_1 + \beta_2 * x_2 + \dots \beta_n * x_n + u_i)}$$

And,

$$\text{prevalence} = p = \frac{e^{(\alpha + \beta_1 * x_1 + \beta_2 * x_2 + \dots \beta_n * x_n + u_i)}}{1 + e^{(\alpha + \beta_1 * x_1 + \beta_2 * x_2 + \dots \beta_n * x_n + u_i)}}$$

$x_1 - x_n$  were cluster-level variables, including age, sex (boys vs girls) or the proportion of girl (or the proportion of boy), setting (rural vs urban), investigation site (community-based or facility-based [school-based and health check-ups]), SDI (categorical as high-middle SDI vs low-middle and low SDI), WHO region, investigation period (categorical as before 2000, 2000-2009, 2010 and later), retinol test method. The associations of cluster-level variables were first examined using an age-adjusted meta-regression are shown in Table S4 in the **Online Supplementary Document**. The prevalence of VAD was found to be negatively associated with age and SDI, decreased in recent decades, and higher among boys (than among girls), in rural areas (than in urban areas), in low-middle

and low SDI region (than in high-middle SDI region), in AFR (than in WPR). While the prevalence of mVAD significantly decreased with increased age, and was higher in rural areas (than in urban areas). Bases on expertise, we included age and SDI as covariates in the regression models of VAD/mVAD prevalence. Therefore,

$$\text{logit}(p) = \alpha + \beta_1 * \text{Age} + \beta_2 * \text{SDI} + u_i$$

Then,

$$\text{prevalence of VAD/mVAD} = p = \frac{e^{(\alpha + \beta_1 * \text{Age} + \beta_2 * \text{SDI} + u_i)}}{1 + e^{(\alpha + \beta_1 * \text{Age} + \beta_2 * \text{SDI} + u_i)}} = \frac{(\text{number of VAD or mVAD cases})}{(\text{number of participants})}$$

The graphical relation of age and prevalence of VAD and mVAD by SDI was demonstrated in Figure S2 in the **Online Supplementary Document**.

**Stage 4:** Estimation of the national prevalence of VAD and mVAD in children in 2019

Based on the above models, the age- and SDI-specific prevalence estimates of VAD and mVAD were respectively estimated. First, the total numbers of children affected by VAD and mVAD (“VAD envelope” and “mVAD envelope”) in LMICs were respectively calculated by multiplying the estimated age- and SDI-specific prevalence rates by the corresponding paediatric populations in 2019, obtained from the United Nations Population Division.<sup>[118]</sup> As shown in Table S4 in the **Online Supplementary Document**, the prevalence of VAD and mVAD was higher in rural areas than in urban areas, to take into account this effect of urbanization, the odds ratios (OR) of being in urban areas (vs in rural areas) for VAD and mVAD as generated in stage 3 were obtained, and a risk-factor-based model was used to distribute the total numbers of children affected by VAD and mVAD in LMICs into the 165 LMIC nations[119,120] , by using the formula as follows:

$$N_{\text{country}} = (\text{Pop}_{\text{country}}) \times (\text{Prev}_{\text{VAD/mVAD}_{\text{LMICs}}}) \times [1 + (\text{Prev}_{\text{urbanization}_{\text{country}}} - \text{Prev}_{\text{urbanization}_{\text{LMICs}}}) \times (\text{OR}_{\text{urbanization}_{\text{LMICs}}} - 1)]$$

Where  $N_{\text{country}}$  and  $\text{Pop}_{\text{country}}$  are the number of VAD/mVAD cases and population size in children aged 18 years or younger in each country or territory.  $\text{Prev}_{\text{VAD/mVAD}_{\text{LMICs}}}$  indicates the estimated prevalence of VAD or mVAD in LMICs where this country belongs.  $\text{Prev}_{\text{urbanization}_{\text{country}}}$  and  $\text{Prev}_{\text{urbanization}_{\text{LMICs}}}$  are the prevalence rates of urbanization in each country and in LMICs.

$\text{OR}_{\text{urbanization}_{\text{LMICs}}}$  is the estimated OR of urbanization (urban areas vs rural areas) in LMICs. Finally,

the national prevalence of VAD and mVAD was generated by dividing the number of VAD and mVAD cases by the corresponding paediatric population in 2019.

## References

- 1 Disalvo L, Biochemista AV, Biochemista NM, Biochemista AM, Fasano MV, González HFJAAP. Vitamin A deficiency and associated factors in preschoolers from the outskirts of La Plata, Buenos Aires. 2019;117:19-25.
- 2 Onoja U, Iloeje I, Onoja N, Uzor PJPJN. Nutritional status of adolescent schoolchildren in South East Nigeria. 2019;18:845-51.
- 3 Hanson C, Lyden E, Anderson-Berry A, Kocmich N, Rezac A, Delair S, et al. Status of retinoids and carotenoids and associations with clinical outcomes in maternal-infant pairs in Nigeria. 2018;10:1286.
- 4 Ayogu RN, Afiaenyi IC, Madukwe EU, Udenta EAJBph. Prevalence and predictors of under-nutrition among school children in a rural South-eastern Nigerian community: a cross sectional study. 2018;18:1-9.
- 5 Pouraram H, Djazayeri A, Mohammad K, Parsaeian M, Abdollahi Z, Motlagh AD, et al. Second national integrated micronutrient survey in Iran: Study design and preliminary findings. 2018;21:137-44.
- 6 Abolurin OO, Adegbola AJ, Oyelami OA, Adegoke SA, Bolaji OOJNPMJ. Prevalence of vitamin A deficiency among under-five children in South-Western Nigeria. 2018;25:13.
- 7 Lima DB, Damiani LP, Fujimori EJRPdP. Vitamin A deficiency in Brazilian children and associated variables. 2018;36:176-85.
- 8 Chyne DAL, Meshram II, Rajendran A, Kodali V, Getti N, Roy P, et al. Nutritional status, food insecurity, and biodiversity among the Khasi in Meghalaya, North - East India. 2017;13:e12557.
- 9 Longvah T, Khutsoh B, Meshram II, Krishna S, Kodali V, Roy P, et al. Mother and child nutrition among the Chakhesang tribe in the state of Nagaland, North - East India. 2017;13:e12558.
- 10 Alaofè H, Burney J, Naylor R, Taren DJPhn. Prevalence of anaemia, deficiencies of iron and vitamin A and their determinants in rural women and young children: a cross-sectional study in Kalalé district of northern Benin. 2017;20:1203-13.
- 11 Rahman S, Rahman AS, Alam N, Ahmed AS, Ireen S, Chowdhury IA, et al. Vitamin A deficiency and determinants of vitamin A status in Bangladeshi children and women: findings of a national survey. 2017;20:1114-25.
- 12 Alouache A, Hamma AS, Zenia S, Benlatreche CJCDNEDD. Status and intakes in vitamin A of a sample of young children Algerians. 2017;52:100-5.
- 13 Ayogu RN, Nnam NM, Ibemesi O, Okechukwu FJAHS. Prevalence and factors associated with anthropometric failure, vitamin A and iron deficiency among adolescents in a Nigerian urban community. 2016;16:389-98.
- 14 Wei X, Peng R, Cao J, Kang Y, Qu P, Liu Y, et al. Serum vitamin A status is associated with obesity and the metabolic syndrome among school-age children in Chongqing, China. 2016;25:563-70.
- 15 Villalpando S, de la Cruz V, Shamah-Levy T, Rebollar R, Contreras-Manzano AJSpdM. Nutritional status of iron, vitamin B12, folate, retinol and anemia in children 1 to 11 years old. Results of the Ensanut 2012. 2015;57:373-84.
- 16 Talsma EF, Verhoef H, Brouwer ID, Mburu-de Wagt AS, Hulshof PJ, Melse-Boonstra AJBm. Proxy markers of serum retinol concentration, used alone and in combination, to assess population vitamin A status in Kenyan children: a cross-sectional study. 2015;13:1-9.
- 17 Marasinghe E, Chackrewarthy S, Abeyseena C, Rajindrajith SJAPjocn. Micronutrient status and its relationship with nutritional status in preschool children in urban Sri Lanka. 2015;24:144-51.
- 18 Sandjaja, Jus'at I, Jahari AB, Ifrad, Htet MK, Tilden RL, et al. Vitamin A-fortified cooking oil reduces vitamin A deficiency in infants, young children and women: results from a programme evaluation in Indonesia. Public health nutrition. 2015;18:2511-22.

- 19 Faber M, van Jaarsveld PJ, Kunneke E, Kruger HS, Schoeman SE, van Stuijvenberg MEJN. Vitamin A and anthropometric status of South African preschool children from four areas with known distinct eating patterns. 2015;31:64-71.
- 20 Konstantyner T, Warkentin S, de Aguiar Carrazedo Taddei JAJF, bulletin n. Prevalence and determinants of vitamin A deficiency among Brazilian children under 2 years of age from the 2006 National Demographic Health Survey. 2014;35:422-30.
- 21 Herrador Z, Sordo L, Gadisa E, Buño A, Gómez-Rioja R, Iturzaeta JM, et al. Micronutrient deficiencies and related factors in school-aged children in Ethiopia: a cross-sectional study in Libo Kemkem and Fogera districts, Amhara Regional State. 2014;9:e112858.
- 22 Ribeiro-Silva RdC, Nunes IL, Assis AMOJJdp. Prevalence and factors associated with vitamin A deficiency in children and adolescents. 2014;90:486-92.
- 23 Martínez-Torres J, Meneses-Echavéz JF, Ramírez-Vélez RJEyN. Prevalence of demographic factors associated with vitamin A deficiency in Colombian children aged 12–59 months. 2014;61:460-6.
- 24 Dong C, Ge P, Ren X, Zhao X, Wang J, Fan H, et al. The micronutrient status of children aged 24–60 months living in rural disaster areas one year after the Wenchuan earthquake. 2014;9:e88444.
- 25 Rohner F, Northrop-Clewes C, Tschannen AB, Bosso PE, Kouassi-Gohou V, Erhardt JG, et al. Prevalence and public health relevance of micronutrient deficiencies and undernutrition in pre-school children and women of reproductive age in Cote d'Ivoire, West Africa. 2014;17:2016-28.
- 26 Rojroongwasinkul N, Kijboonchoo K, Wimonpeerapattana W, Purttiponthanee S, Yamborisut U, Boonpradern A, et al. SEANUTS: the nutritional status and dietary intakes of 0.5–12-year-old Thai children. 2013;110:S36-S44.
- 27 Poh BK, Ng BK, Haslinda MDS, Shanita SN, Wong JE, Budin SB, et al. Nutritional status and dietary intakes of children aged 6 months to 12 years: findings of the Nutrition Survey of Malaysian Children (SEANUTS Malaysia). 2013;110:S21-S35.
- 28 de Queiroz D, Paiva AdA, Pedraza DF, Cunha MALd, Esteves GH, de Luna JG, et al. Vitamin A deficiency and associated factors in children in urban areas. 2013;47:248-56.
- 29 Laillou A, Pham TV, Tran NT, Le HT, Wieringa F, Rohner F, et al. Micronutrient deficits are still public health issues among women and young children in Vietnam. 2012;7:e34906.
- 30 Hotz C, Chileshe J, Siamusantu W, Palaniappan U, Kafwembe EJPhn. Vitamin A intake and infection are associated with plasma retinol among pre-school children in rural Zambia. 2012;15:1688-96.
- 31 Laxmaiah A, Nair MK, Arlappa N, Raghu P, Balakrishna N, Rao KM, et al. Prevalence of ocular signs and subclinical vitamin A deficiency and its determinants among rural pre-school children in India. 2012;15:568-77.
- 32 Van Stuijvenberg ME, Schoeman SE, Lombard CJ, Dhansay MAJPHN. Serum retinol in 1–6-year-old children from a low socio-economic South African community with a high intake of liver: implications for blanket vitamin A supplementation. 2012;15:716-24.
- 33 Engle-Stone R, Haskell MJ, Ndjebayi AO, Nankap M, Erhardt JG, Gimou M-M, et al. Plasma retinol-binding protein predicts plasma retinol concentration in both infected and uninfected Cameroonian women and children. 2011;141:2233-41.
- 34 Temple VJ, Kaira C, Vince JD, Kevau IH, Willie NJPNGMJ. Vitamin A status of pre-school-age children aged 6 to 59 months in the National Capital District, Papua New Guinea. 2011;54:4-16.
- 35 Arlappa N, Laxmaiah A, Balakrishna N, Harikumar R, Kodavanti MR, Gal Reddy C, et al. Micronutrient deficiency disorders among the rural children of West Bengal, India. 2011;38:281-9.



- 36 Arlappa N, Balakrishna N, Laxmaiah A, Raghu P, Vikas Rao V, Madhavan Nair K, et al. Prevalence of vitamin A deficiency and its determinants among the rural pre-school children of Madhya Pradesh, India. 2011;38:131-6.
- 37 Fares S, Chahed MK, Feki M, Beji C, Traissac P, El Ati J, et al. Status of vitamins A and E in schoolchildren in the centre west of Tunisia: a population-based study. 2011;14:255-60.
- 38 Durán P, Mangialavori G, Biglieri A, Kogan L, Abeyá Gilardon EJRDlSBdP. Nutrition status in Argentinean children 6 to 72 months old: Results from the National Nutrition and Health Survey (ENNyS). 2011;50:30-43.
- 39 Dillon D, Htet MK, Chiwile FPJMJoI. The application of correction factors on serum retinol of Indonesia school children. 2010;19:258-63.
- 40 Custodio V, Daneluzzi JC, Custodio R, Del Ciampo LA, Ferraz I, Martinelli C, et al. Vitamin A deficiency among Brazilian school-aged children in a healthy child service. 2009;63:485-90.
- 41 Khatib IM, Elmadfa IJAoN, Metabolism. Poor nutritional health of Bedouin preschool children in Jordan: the irony of urbanization. 2009;54:301-9.
- 42 Tatala S, Kihamia C, Kyungu L, Svanberghaaa UJTjohr. Risk factors for anaemia in schoolchildren in Tanga Region, Tanzania. 2008;10.
- 43 Jiang J-X, Lin L-M, Lian G-L, Greiner TJWJoP. Vitamin A deficiency and child feeding in Beijing and Guizhou, China. 2008;4:20-5.
- 44 Calis JC, Phiri KS, Faragher EB, Brabin BJ, Bates I, Cuevas LE, et al. Severe anemia in Malawian children. The New England journal of medicine. 2008;358:888-99.
- 45 Al-Mekhlafi MH, Azlin M, Aini UN, Shaik A, Sa'iah A, Norhayati MJTotRSoTM, et al. Prevalence and predictors of low serum retinol and hypoalbuminaemia among children in rural Peninsular Malaysia. 2007;101:1233-40.
- 46 Yang R, Li R, Mao S, Sun L, Huang X, Ji C, et al. The survey of serum retinol of the children aged 0~ 4 years in Zhejiang Province, China. 2007;7:1-7.
- 47 Khan NC, Ninh NX, Nhien NV, Khoi HH, West CE, Hautvast JGJAPJoCN. Sub clinical vitamin A deficiency and anemia among Vietnamese children less than five years of age. 2007;16:152-7.
- 48 Jingxiong J, Toschke AM, von Kries R, Koletzko B, Liangming LJPhn. Vitamin A status among children in China. 2006;9:955-60.
- 49 Hix J, Rasca P, Morgan J, Denna S, Panagides D, Tam M, et al. Validation of a rapid enzyme immunoassay for the quantitation of retinol-binding protein to assess vitamin A status within populations. 2006;60:1299-303.
- 50 Maziya-Dixon BB, Akinyele IO, Sanusi RA, Oguntona TE, Nokoe SK, Harris EWJTJon. Vitamin A deficiency is prevalent in children less than 5 y of age in Nigeria. 2006;136:2255-61.
- 51 Thurlow RA, Winichagoon P, Green T, Wasantwisut E, Pongcharoen T, Bailey KB, et al. Only a small proportion of anemia in northeast Thai schoolchildren is associated with iron deficiency-. 2005;82:380-7.
- 52 Santos MA, Rezende EG, Lamounier JA, Galvão MAM, Bonomo É, Leite RCJRdN. Vitamin A deficiency in school children of the rural area in Minas Gerais, Brazil. 2005;18:331-9.
- 53 Nasri I, Bouhali E, Aguenou H, Mokhtar NJAHS. Vitamin A deficiency among Moroccan women and children. 2004;4:3-8.
- 54 Coles C, Levy A, Gorodischer R, Dagan R, Deckelbaum R, Blaner W, et al. Subclinical vitamin A deficiency in Israeli-Bedouin toddlers. 2004;58:796-802.
- 55 Gamble M, Palafox N, Dancheck B, Ricks M, Briand K, Semba RJEjoen. Relationship of vitamin A deficiency, iron deficiency, and inflammation to anemia among preschool children in the Republic of the Marshall Islands. 2004;58:1396-401.
- 56 Yamamura CM, Sullivan KM, van der Haar F, Auerbach SB, Iohp KKJJoTP. Risk factors for vitamin A deficiency among preschool aged children in Pohnpei, Federated States of Micronesia. 2004;50:16-9.

- 57 Villalpando S, Montalvo-Velarde I, Zambrano N, García-Guerra A, Ramírez-Silva CI, Shamah-Levy T, et al. Vitamins A, and C and folate status in Mexican children under 12 years and women 12-49 years: a probabilistic national survey. 2003;45:508-19.
- 58 Adelekan DA, Northrop-Clewes CA, Owa JA, Oyedeji AO, Owoeye AA, Thurnham DIJBJoN. Use of biomarkers of sub-clinical infection, nutrition and neonatal maturity to interpret plasma retinol in Nigerian neonates. 2003;90:353-61.
- 59 Oso O, Abiodun P, Omotade O, Oyewole DJJotp. Vitamin A status and nutritional intake of carotenoids of preschool children in Ijaye Orile community in Nigeria. 2003;49:42-7.
- 60 Palafox NA, Gamble MV, Dancheck B, Ricks MO, Briand K, Semba RDJN. Vitamin A deficiency, iron deficiency, and anemia among preschool children in the Republic of the Marshall Islands. 2003;19:405-8.
- 61 Tan Z, Ma G, Lin L, Liu C, Liu Y, Jiang J, et al. Prevalence of subclinical vitamin A deficiency and its affecting factors in 8 669 children of China. 2002;36:161-3.
- 62 Schémann J-F, Banou AA, Guindo A, Joret V, Traore L, Malvy DJJotACoN. Prevalence of undernutrition and vitamin A deficiency in the Dogon Region, Mali. 2002;21:381-7.
- 63 Swami H, Thakur J, Bhatia S, Ahuja RJTIJoP. Rapid assessment and delivery of Vitamin A to slum children by using National Immunization Day in Chandigarh. 2001;68:719-23.
- 64 Control CfD, Prevention. Vitamin A deficiency among children--Federated States of Micronesia, 2000. 2001;50:509-12.
- 65 Kassaye T, Receveur O, Johns T, Becklake MRJBotWHO. Prevalence of vitamin A deficiency in children aged 6-9 years in Wukro, northern Ethiopia. 2001;79:415-22.
- 66 Control CfD, Prevention. Nutritional assessment of adolescent refugees--Nepal, 1999. 2000;49:864-7.
- 67 Ferraz I, Daneluzzi JC, Vannucchi HJNR. Vitamin A deficiency in children aged 6 to 24 months in São Paulo State, Brazil. 2000;20:757-68.
- 68 Li X, Zhou Y, Si K, Li H, Zhang L, Zhang Y, et al. Relationship of plasma vitamin A levels between neonates and pregnant women in third trimester. 2020;52:464-9.
- 69 Zhang Z-H, Ni M, Hu YJZDdekzzCJoCP. Current status of vitamin A deficiency in preschool children in Dongguan, China and the effect of vitamin A on serum ferritin and red blood cell parameters. 2018;20:195-9.
- 70 Gubert MB, Spaniol AM, Bortolini GA, Pérez-Escamilla RJPHN. Household food insecurity, nutritional status and morbidity in Brazilian children. 2016;19:2240-5.
- 71 Jin C, Wang X, Zhang L, Zhang Y, Li N, Wang J, et al. Analysis of fat-soluble vitamins A, D, E levels in the serum of healthy children. 2016;24:349-53.
- 72 Pajuelo J, Miranda M, Zamora R. Prevalence of vitamin a deficiency and anemia in children under five years of age in Peru. 2015.
- 73 De Moura FF, Moursi M, Lubowa A, Ha B, Boy E, Oguntona B, et al. Cassava intake and vitamin A status among women and preschool children in Akwa-Ibom, Nigeria. 2015;10:e0129436.
- 74 Kurihayashi AY, Augusto RA, Escaldelai FMD, Martini LAJCDSP. Vitamin A and D status among child participants in a food supplementation program. 2015;31:531-42.
- 75 Augusto RA, Cobayashi F, Cardoso MAJPHN. Associations between low consumption of fruits and vegetables and nutritional deficiencies in Brazilian schoolchildren. 2015;18:927-35.
- 76 Peng R, Wei X, Liang X, Chen J, Liu Y, Zhang T, et al. Effect of dietary vitamin A intake on plasma vitamin A concentration in preschool children of Banan district, Chongqing, China. 2014;46:366-72.
- 77 de Paula WKAS, Caminha MdC, Figueirôa JN, Batista Filho MJC, coletiva s. Anemia and vitamin A deficiency in children under five years old attended under the Family Health Program in the State of Pernambuco, Brazil. 2014;19:1209.

- 78 Rohner F, Bradley AW, Grant JA, Elizabeth AY, Lebanan MAO, Rayco-Solon P, et al. Infant and young child feeding practices in urban Philippines and their associations with stunting, anemia, and deficiencies of iron and vitamin A. 2013;34:S17-S34.
- 79 Miglioli TC, Fonseca VM, de Lira PIC, Batista Filho MJC, Coletiva S. Vitamin A deficiency in mothers and children in the state of Pernambuco. 2013;18:1427.
- 80 Fan P, Shen Y, Li Y, Ma A, Sun Z, Wang ZJWSyJJoHR. Serum retinol and carotenoid of rural infants and young children in Linyi of Shangdong Province and analysis on their related influencing dietary factors. 2012;41:424-8.
- 81 Garcia MT, Granado FS, Cardoso MAJCdSP. Complementary feeding and nutritional status of 6-24-month-old children in Acrelândia, Acre State, Western Brazilian Amazon. 2011;27:305-16.
- 82 Midyat L, Zafer Kurugöl N, Akşit S, Tanrıverdi M, Yağcı RVJAP. Dietary vitamin A intake and serum retinol concentrations of preschool children from different socio - economical levels in İzmir, Turkey. 2011;100:e24-e7.
- 83 Sales de Azevedo MM, Coelho Cabral P, Diniz AdS, Fisberg M, Fisberg RM, Grande de Arruda IKJALdN. Vitamin A deficiency in preschool children of Recife, Northeast of Brazil. 2010;60:36-41.
- 84 Demissie T, Ali A, Mekonen Y, Haider J, Umeta MJF, bulletin n. Magnitude and distribution of vitamin A deficiency in Ethiopia. 2010;31:234-41.
- 85 Khatib IM, Elmadfa IJAoN, Metabolism. High prevalence rates of anemia, vitamin A deficiency and stunting imperil the health status of Bedouin schoolchildren in North Badia, Jordan. 2009;55:358-67.
- 86 Duran P, Mangialavori G, Biglieri A, Kogan LJAadp. Nutrition status in Argentinean children 6 to 72 months old: results from the National Nutrition and Health Survey (ENNyS). 2009;107:397-404.
- 87 Maslova E, Mora-Plazas M, Forero Y, López-Arana S, Baylin A, Villamor EJJ, et al. Are vitamin A and iron deficiencies re-emerging in urban Latin America? A survey of schoolchildren in Bogota, Colombia. 2009;30:103-11.
- 88 Leal JY, Romero T, Ortega P, Amaya DJIC. Serum values of interleukin-10, gamma-interferon and vitamin A in female adolescents. 2007;48:317-26.
- 89 Graebner IT, Saito CH, de Souza EMJJdP. Biochemical assessment of vitamin A in schoolchildren from a rural community. 2007;83:247-52.
- 90 Poveda E, Cuartas A, Guarín S, Forero Y, Villarreal EJB. Iron and vitamin A micronutrient status, risk factors for their deficiencies and anthropometric assessment in preschool child from Funza municipality, Colombia. 2007;27:76-93.
- 91 da Silva LdSV, da Veiga GV, Ramalho RAJN. Association of serum concentrations of retinol and carotenoids with overweight in children and adolescents. 2007;23:392-7.
- 92 Zhang Y, Tao F, Yin H, Zhu X, Ji G, Kong S, et al. Breast-feeding, dietary intakes and their associations with subclinical vitamin A deficiency in children in Anhui Province, China. 2007;10:733-8.
- 93 Faruque AS, Khan A, Malek MA, Huq S, Wahed MA, Salam MA, et al. Childhood anemia and vitamin A deficiency in rural Bangladesh. 2006;37:771.
- 94 Paiva AdA, Rondó PHdC, Gonçalves-Carvalho CMR, Illison VK, Pereira JA, Vaz-de-Lima LRA, et al. Prevalence and factors associated with vitamin A deficiency in preschool children from Teresina, Piauí, Brazil. 2006;22:1979-87.
- 95 Li J, Piao J, Guo N, Yang LJWSyJJoHR. Study on the correlation of vitamin A and iron status in children. 2006;35:182-3.
- 96 Ahmed F, Rahman A, Noor AN, Akhtaruzzaman M, Hughes RJPhn. Anaemia and vitamin A status among adolescent schoolboys in Dhaka City, Bangladesh. 2006;9:345-50.
- 97 Ferraz IS, Daneluzzi JC, Vannucchi H, Jordão Jr AA, Ricco RG, Del Ciampo LA, et al. Prevalence of iron deficiency and its association with vitamin A deficiency in preschool children. 2005;81:169-74.

- 98 Monge-Rojas R, Barrantes M, Holst I, Nuñez-Rivas H, Alfaro T, Rodríguez S, et al. Biochemical indicators of nutritional status and dietary intake in Costa Rican Cabécar Indian adolescents. 2005;26:3-16.
- 99 Sibeko L, Dhansay M, Charlton KE, Johns T, Van Stuijvenberg M, Gray-Donald KJPhn. Full-term, peri-urban South African infants under 6 months of age are at risk for early-onset anaemia. 2004;7:813-20.
- 100 Martins MC, Santos LMP, Assis AMOJRdSP. Prevalence of hypovitaminosis A among preschool children from northeastern Brazil, 1998. 2004;38:537-42.
- 101 Castejon H, Ortega P, Amaya D, Gomez G, Leal J, Castejon OJJNN. Co-existence of anemia, vitamin A deficiency and growth retardation among children 24-84 months old in Maracaibo, Venezuela. 2004;7:113-9.
- 102 Mi J, Lin L, Ma G, Gu X, Liu M, Cheng H, et al. Prevalence of vitamin A deficiency in children under six years of age in Tibet, China. 2003;37:419-22.
- 103 Lin L, Liu Y, Ma G, Tan Z, Zhang X, Jiang J, et al. Survey on vitamin A deficiency in children under-6-years in China. 2002;36:315-9.
- 104 Amaya-Castellanos D, Vilorio-Castejón H, Ortega P, Gómez G, Urrieta JR, Lobo P, et al. Vitamin A deficiency and the anthropometric nutritional status of urban and rural marginalized children in the state of Zulia, Venezuela. 2002;43:89-105.
- 105 Oelofse A, Van Raaij J, Benadé A, Dhansay M, Tolboom J, Hautvast JJPHN. Disadvantaged black and coloured infants in two urban communities in the Western Cape, South Africa differ in micronutrient status. 2002;5:289-94.
- 106 Jinabhai C, Taylor M, Coutsooudis A, Coovadia H, Tomkins A, Sullivan KJAoTP. A health and nutritional profile of rural school children in KwaZulu-Natal, South Africa. 2001;21:50-8.
- 107 Dijkhuizen MA, Wieringa FT, West CEJTAjocn. Concurrent micronutrient deficiencies in lactating mothers and their infants in Indonesia. 2001;73:786-91.
- 108 Albalak R, Ramakrishnan U, Stein AD, Van der Haar F, Haber MJ, Schroeder D, et al. Co-occurrence of nutrition problems in Honduran children. 2000;130:2271-3.
- 109 Gowele VF, Kinabo J, Jumbe T, Rybak C, Stuetz WJN. High prevalence of stunting and anaemia is associated with multiple micronutrient deficiencies in school children of small-scale farmers from Chamwino and Kilosa districts, Tanzania. 2021;13:1576.
- 110 Reddy GB, Shalini T, Ghosh S, Pullakhandam R, Kumar BN, Kulkarni B, et al. Prevalence of vitamin A deficiency and dietary inadequacy in Indian school-age children and adolescents. European journal of nutrition. 2022;61:197-209.
- 111 Castro IRR, Normando P, Alves-Santos NH, Bezerra FF, Citelli M, Pedrosa LFC, et al. Methodological aspects of the micronutrient assessment in the Brazilian National Survey on Child Nutrition (ENANI-2019): a population-based household survey. Cadernos de saude publica. 2021;3737:e00301120.
- 112 Reddy GB, Pullakhandam R, Ghosh S, Boiroju NK, Tattari S, Laxmaiah A, et al. Vitamin A deficiency among children younger than 5 y in India: an analysis of national data sets to reflect on the need for vitamin A supplementation. The American journal of clinical nutrition. 2021;113:939-47.
- 113 Tian T, Wang Y, Xie W, Zhang J, Ni Y, Peng X, et al. Multilevel Analysis of the Nutritional and Health Status among Children and Adolescents in Eastern China. Nutrients. 2022;14.
- 114 Janmohamed A, Luvsanjamba M, Norov B, Batsaikhan E, Jamiyan B, Blankenship JL. Complementary feeding practices and associated factors among Mongolian children 6-23 months of age. Maternal & child nutrition. 2020;16 Suppl 2:e12838.
- 115 Shan X, Liu C, Luo X, Zou Y, Huang L, Zhou W, et al. Iodine Nutritional Status and Related Factors among Chinese School-Age Children in Three Different Areas: A Cross-Sectional Study. Nutrients. 2021;13.
- 116 Ernawati F, Syauqy A, Arifin AY, Soekatri MYE, Sandjaja S. Micronutrient Deficiencies and Stunting Were Associated with Socioeconomic Status in Indonesian Children Aged 6-59 Months. Nutrients. 2021;13.

- 117 Hox JJ, Moerbeek M, Van de Schoot R. Multilevel analysis: Techniques and applications: Routledge; 2017.
- 118 United Nations, Department of Economic and Social Affairs, Population Division. World Population Prospects, the 2017 Revision. 2017. Available: <https://esa.un.org/unpd/wpp/>. Accessed April 13, 2022.
- 119 Song P, Xia W, Zhu Y, Wang M, Chang X, Jin S, et al. Prevalence of carotid atherosclerosis and carotid plaque in Chinese adults: A systematic review and meta-regression analysis. 2018;276:67-73.
- 120 Song P, Rudan D, Zhu Y, Fowkes FJ, Rahimi K, Fowkes FGR, et al. Global, regional, and national prevalence and risk factors for peripheral artery disease in 2015: an updated systematic review and analysis. 2019;7:e1020-e30.
